# Supplementary material for: NIR-emitting benzothiazolium cyanines with an enhanced stokes shift for mitochondria imaging in live cells
Source: Royal Society of Chemistry journal article supplement (doi:10.1039/c8ob00327k), 2018-01-01
Supplement: c8ob00327k1.pdf [file c8ob00327k1.pdf]

## **NIR-Emitting Benzothiazolium Cyanines with Enhanced Stokes Shift for Mitochondria Imaging in Live Cells**

Chathura S. Abeywickrama<sup>1</sup>, Hannah J. Baumann<sup>1</sup>, Nicolas Alexander<sup>1</sup>, Leah P. Shriver,<sup>1,2</sup> Michael Konopka<sup>1</sup> and Yi Pang<sup>1,3\*</sup>

<sup>1</sup>Department of Chemistry, <sup>2</sup>Department of Biology and <sup>3</sup>Maurice Morton Institute of Polymer Science, University of Akron, Akron, Ohio 44325, USA.

\*Corresponding Author

### **Supporting Information**

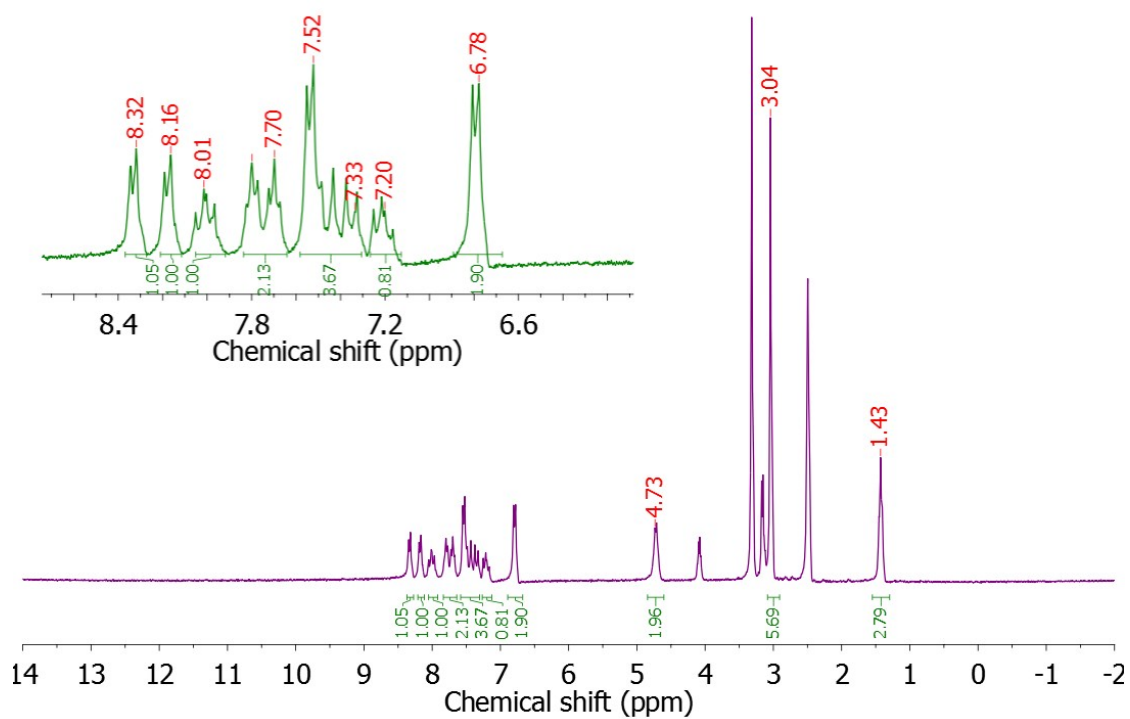

**Figure S1.1**  $^1\text{H}$  NMR spectra of **3a** (300 MHz in DMSO: MeOH 95:5)

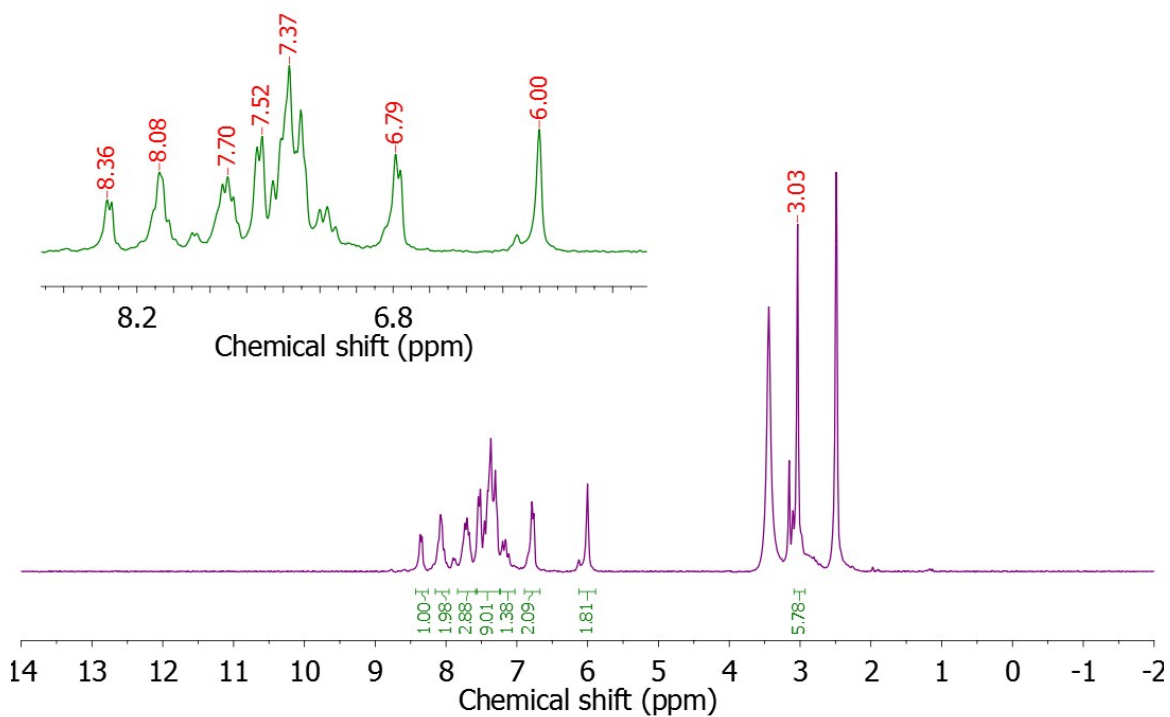

**Figure S1.2**  $^1\text{H}$  NMR spectra of **3b** (300 MHz in DMSO: MeOH 95:5)

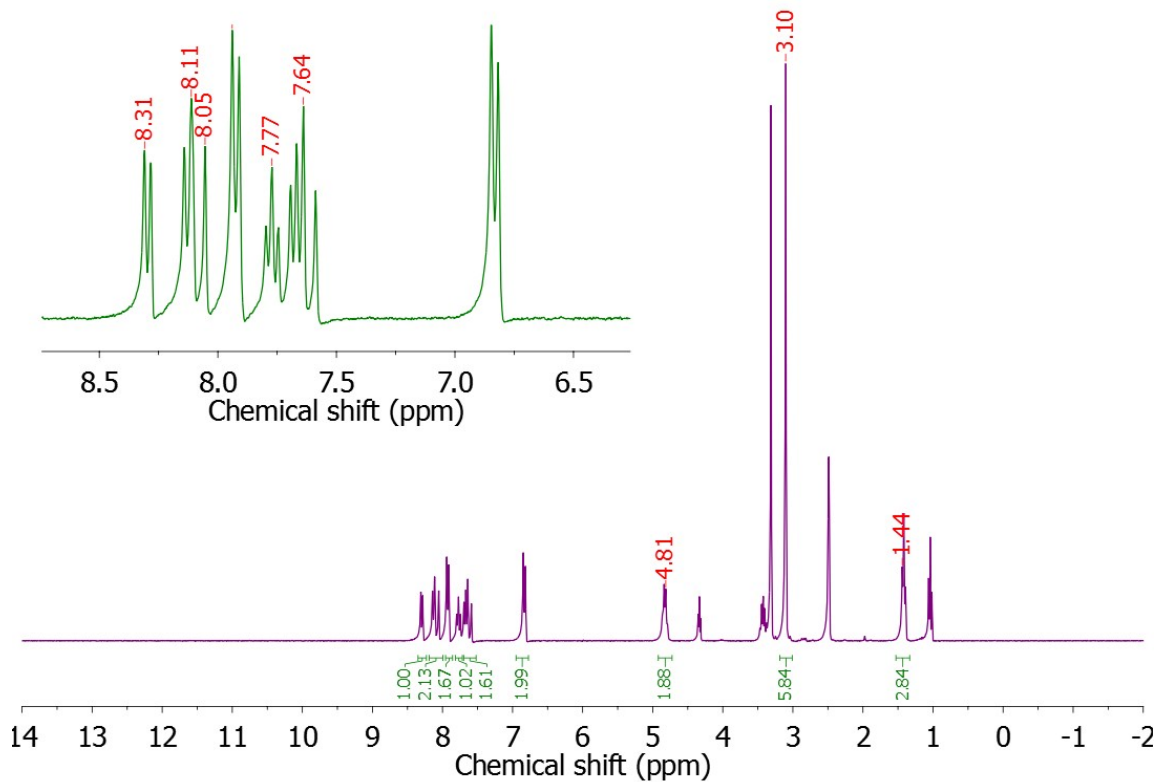

**Figure S1.3**  $^1\text{H}$  NMR spectra of **3c** (300 MHz in DMSO: EtOH 95:5)

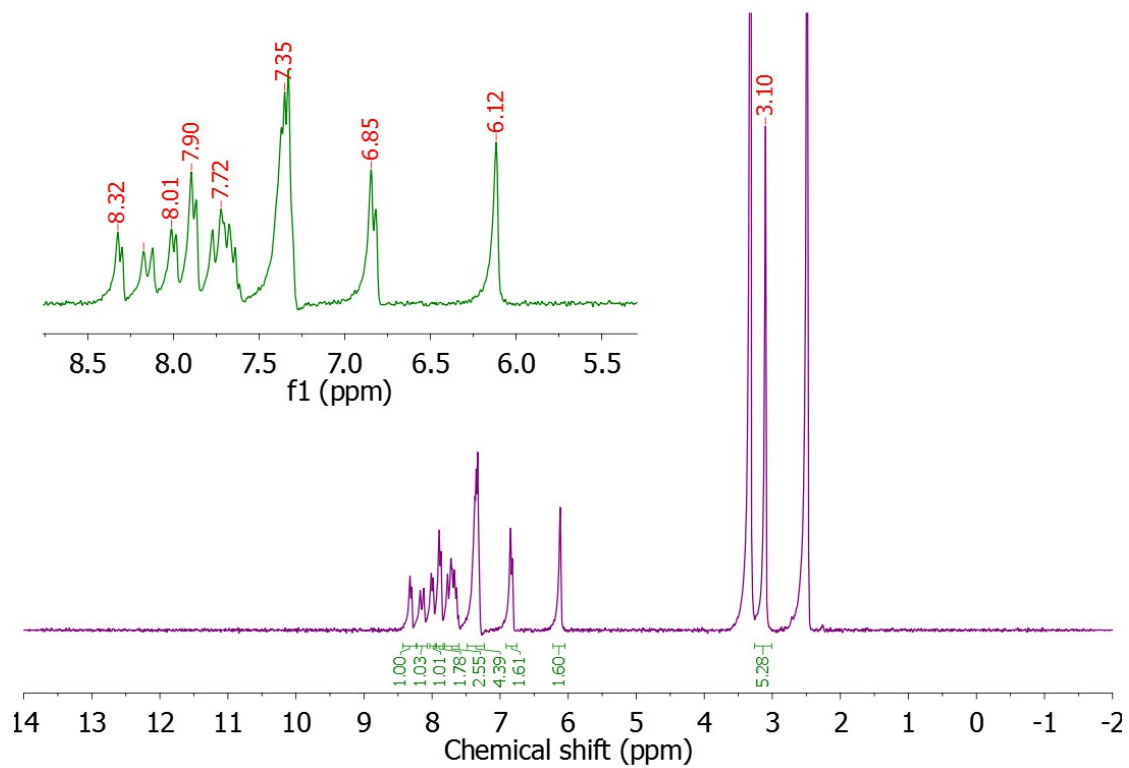

**Figure S1.4**  $^1\text{H}$  NMR spectra of **3d** (300 MHz in DMSO)

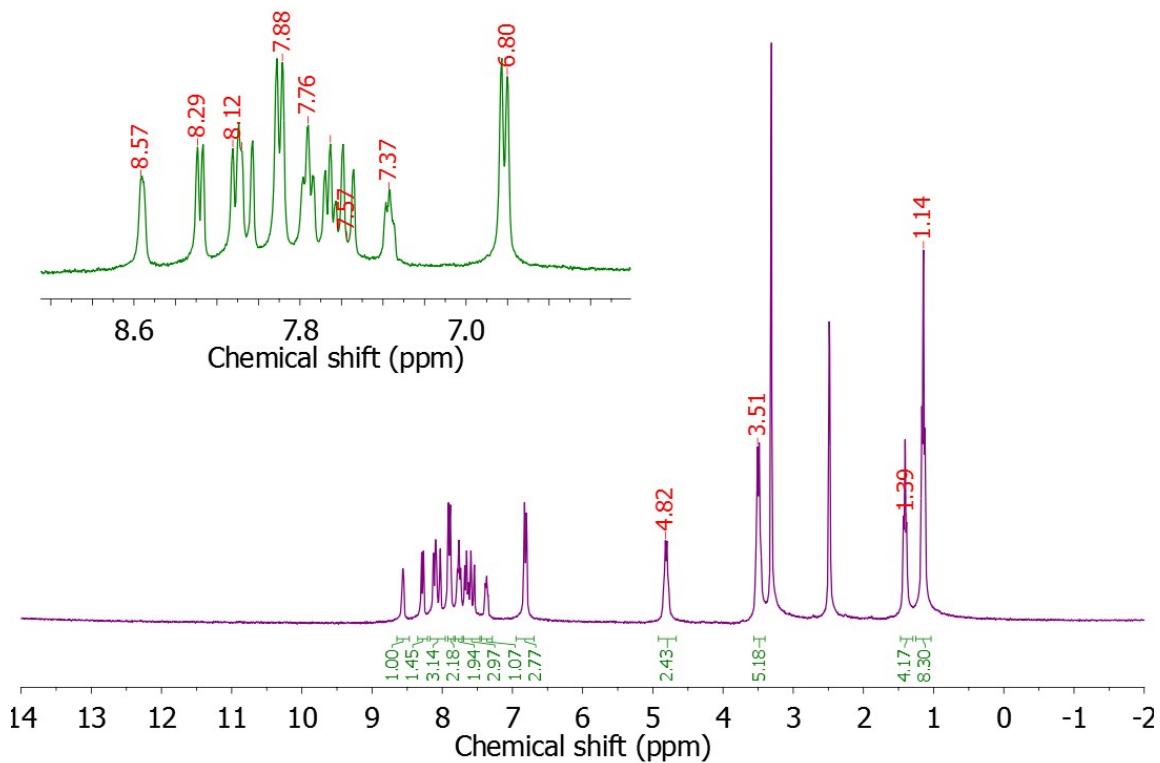

**Figure S1.5**  $^1\text{H}$  NMR spectra of **3e** (300 MHz in DMSO)

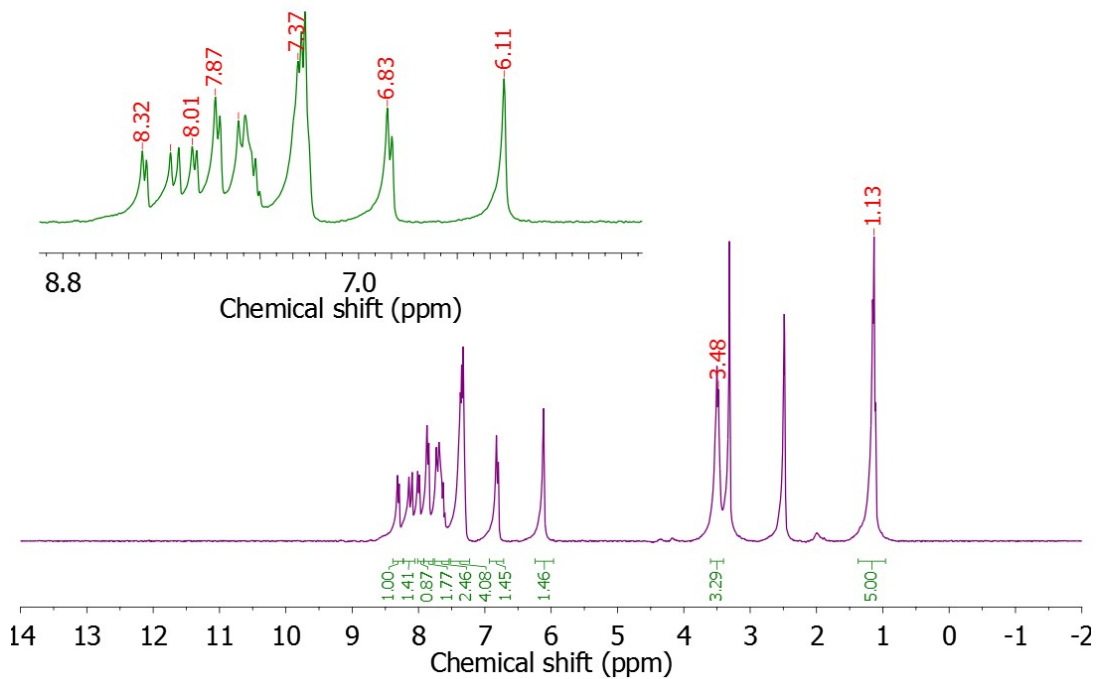

**Figure S1.6**  $^1\text{H}$  NMR spectra of **3f** (300 MHz in DMSO)

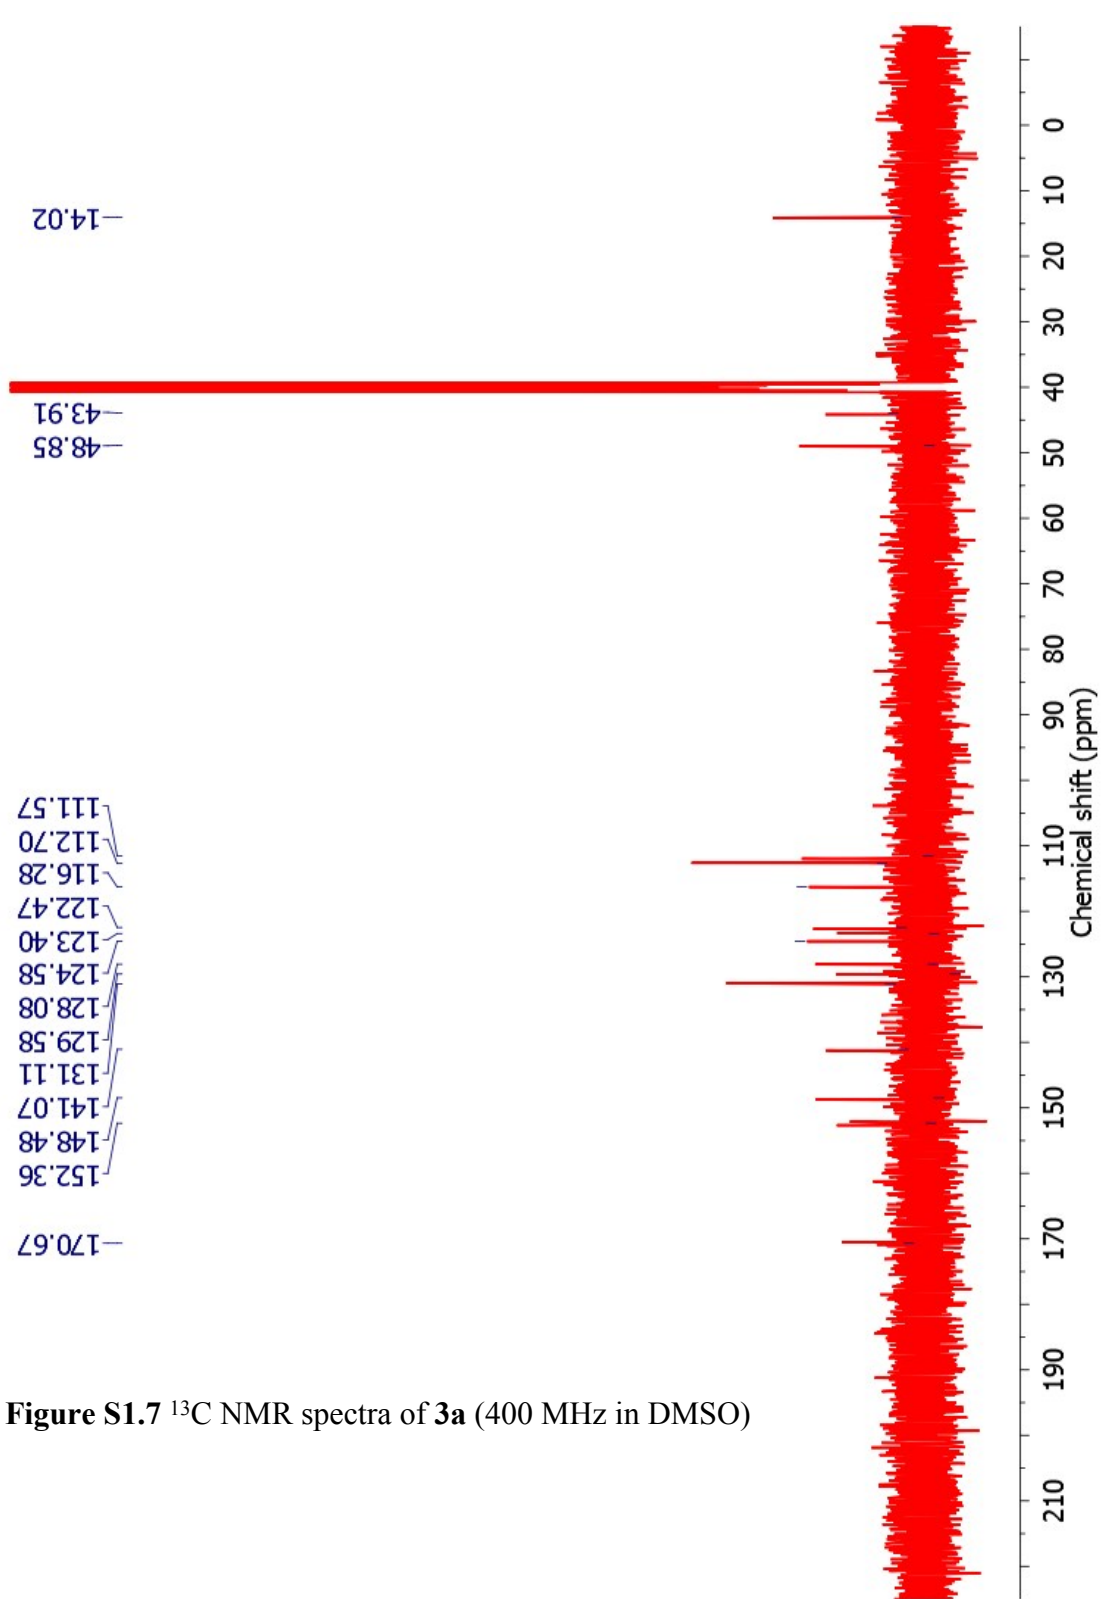

**Figure S1.7**  $^{13}\text{C}$  NMR spectra of **3a** (400 MHz in DMSO)

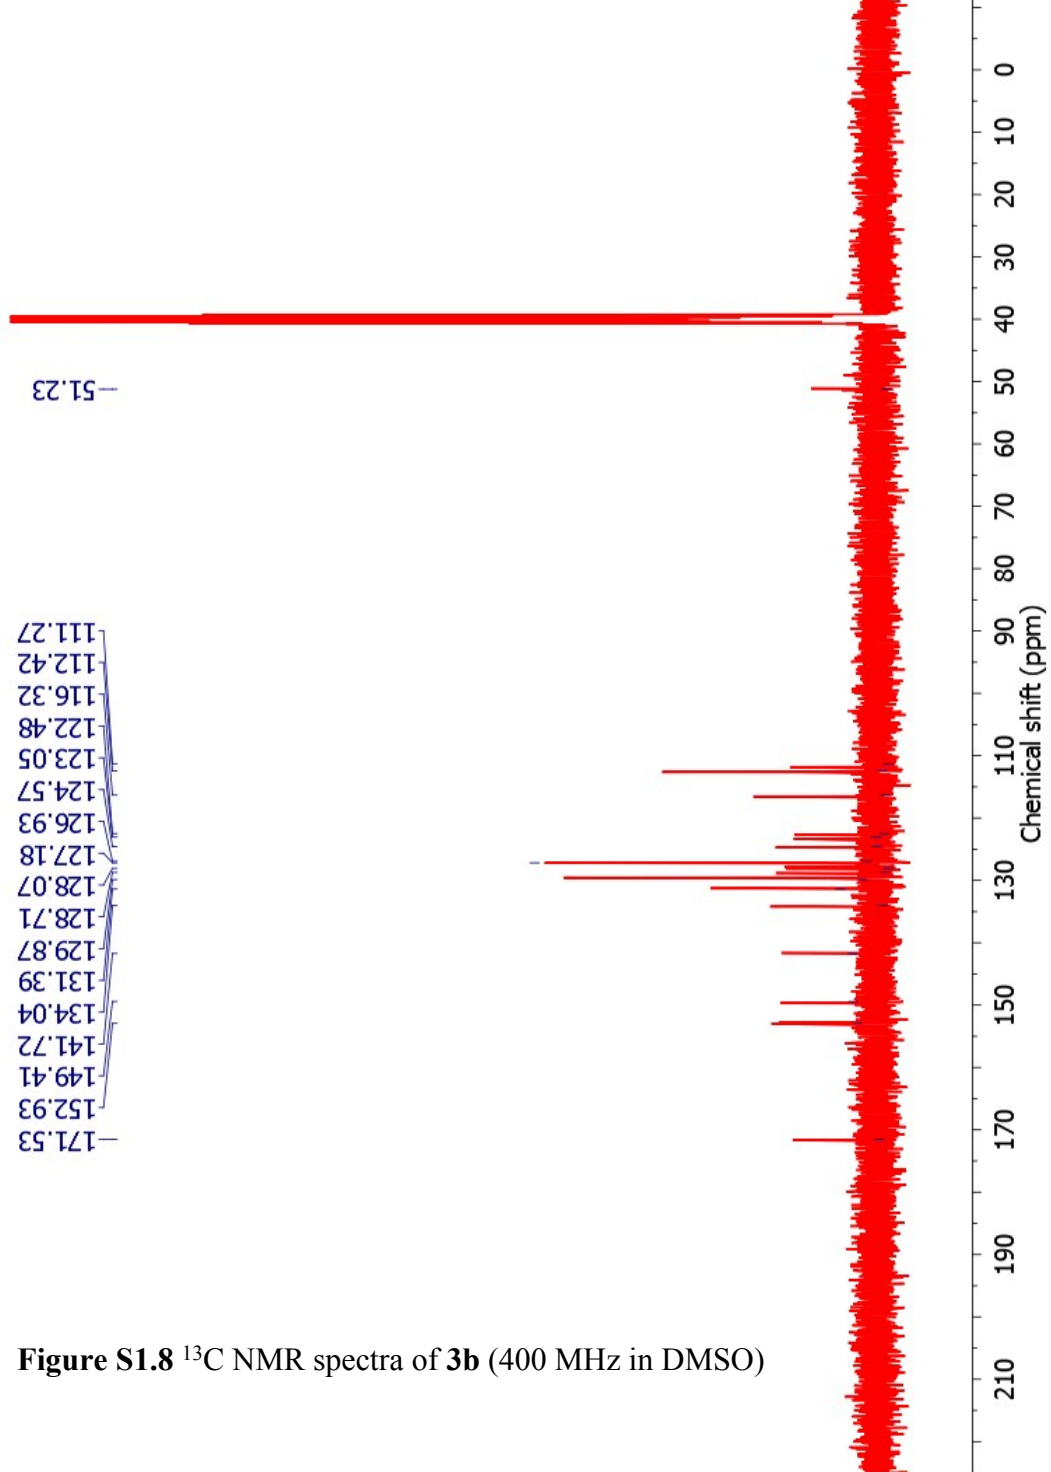

**Figure S1.8**  $^{13}\text{C}$  NMR spectra of **3b** (400 MHz in DMSO)

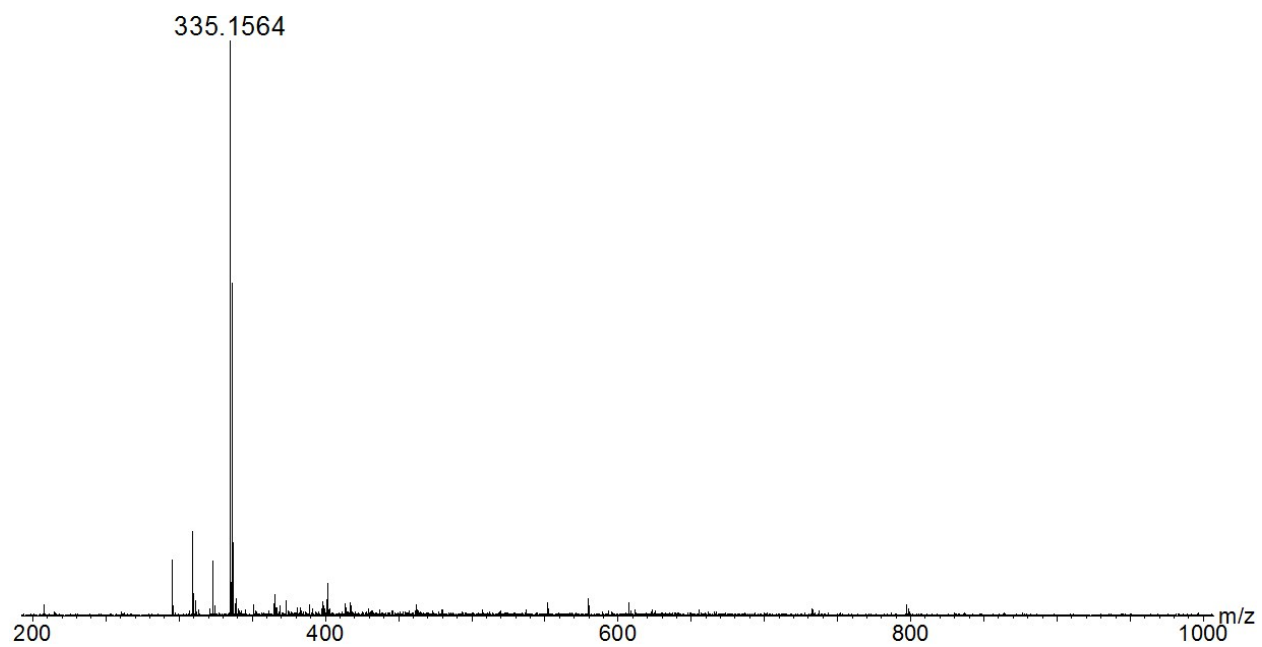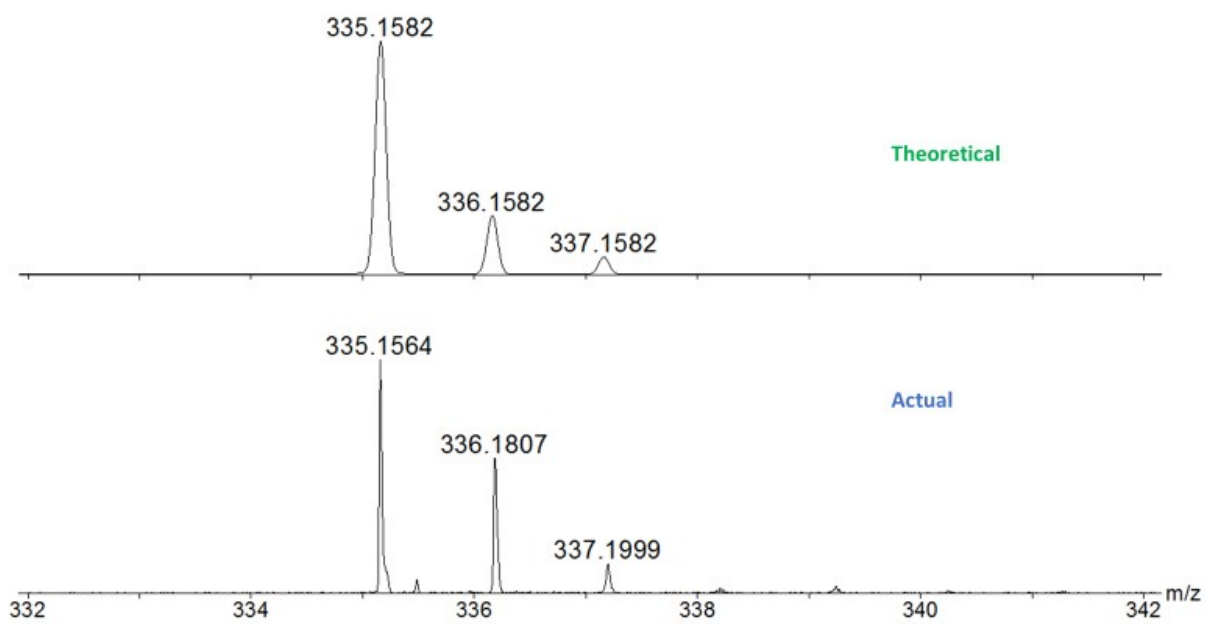

**Figure S2.1** Mass spectra of **3a**

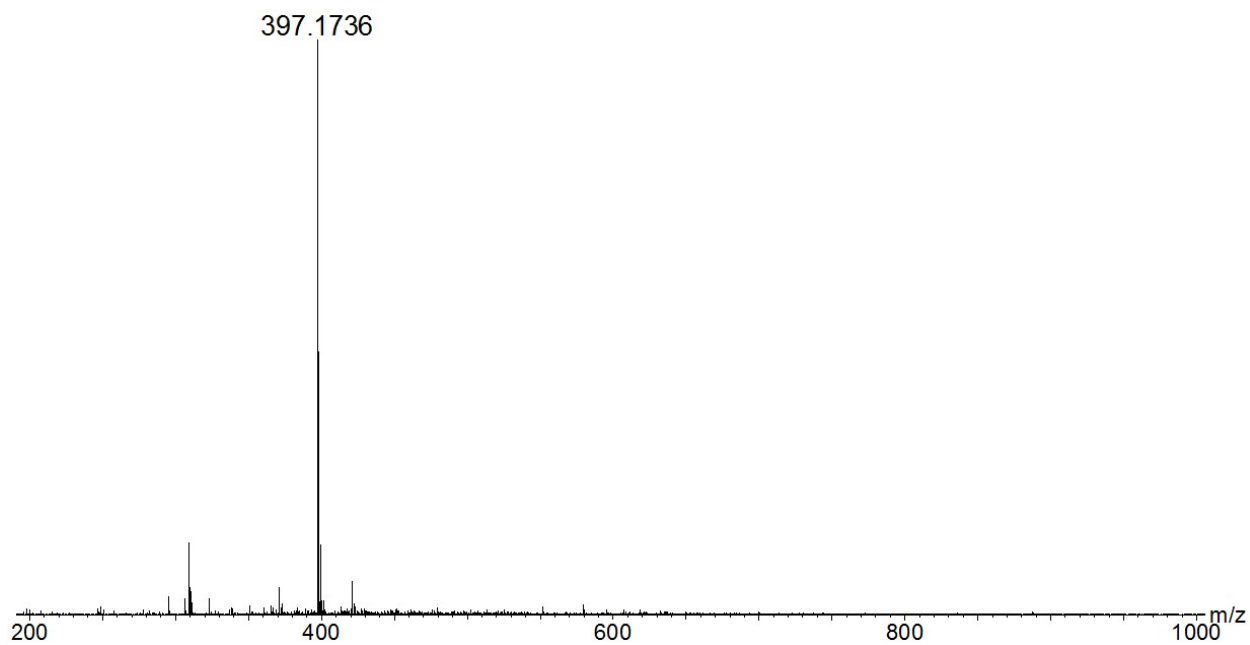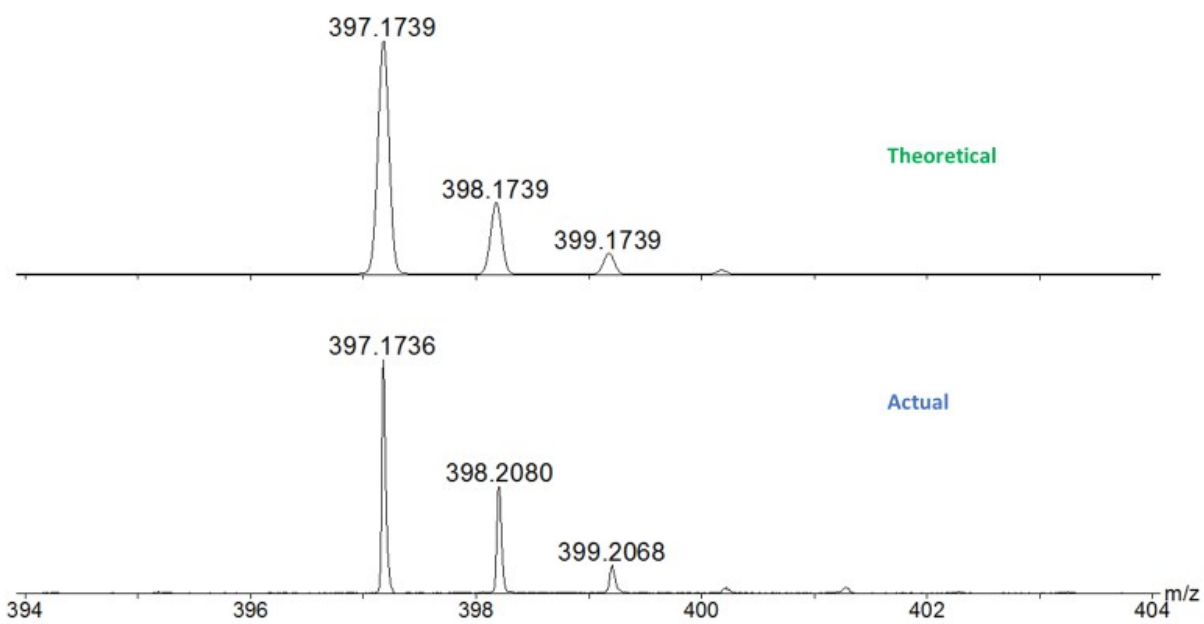

**Figure S2.2** Mass spectra of **3b**



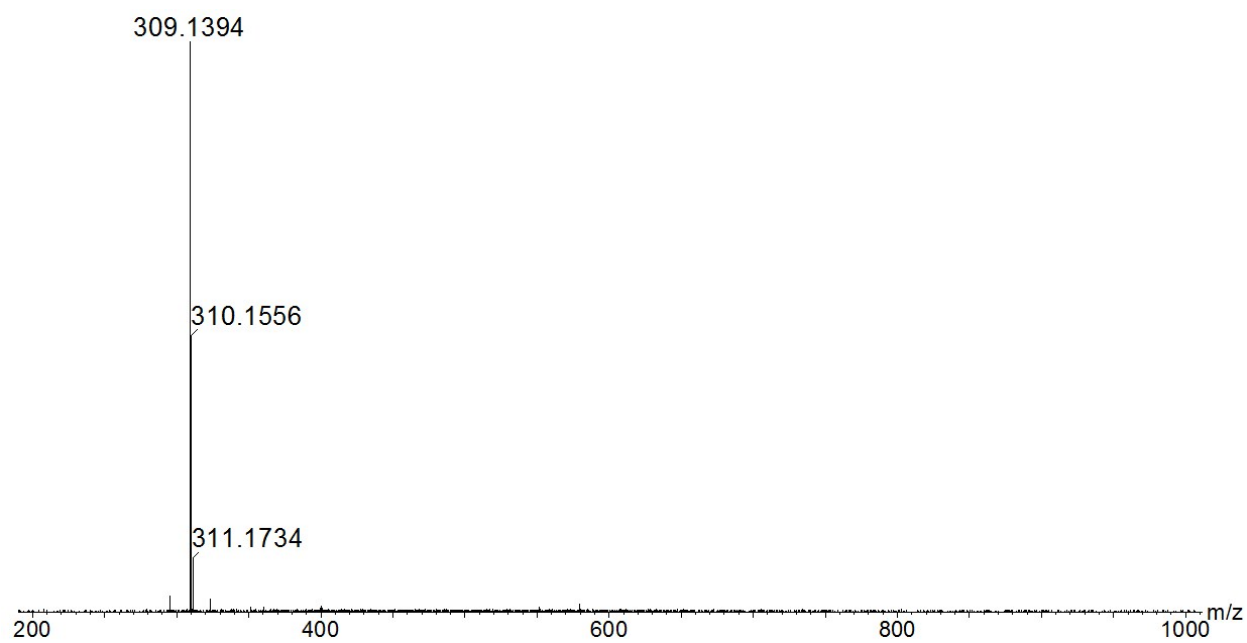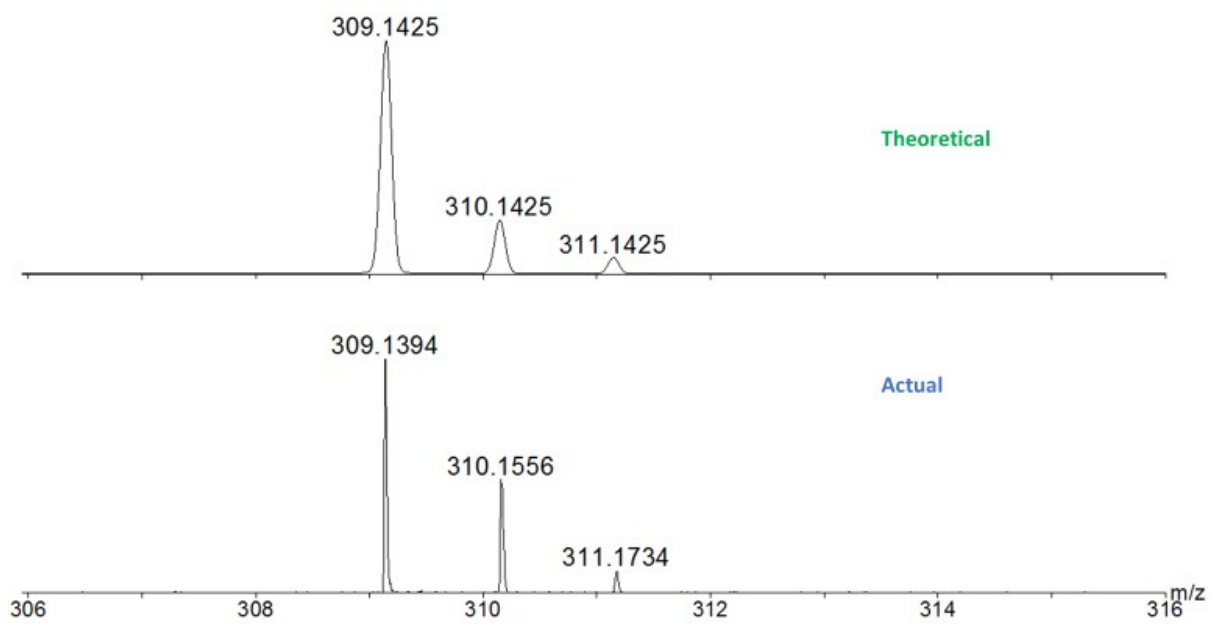

**Figure S2.3** Mass spectra of **3c**

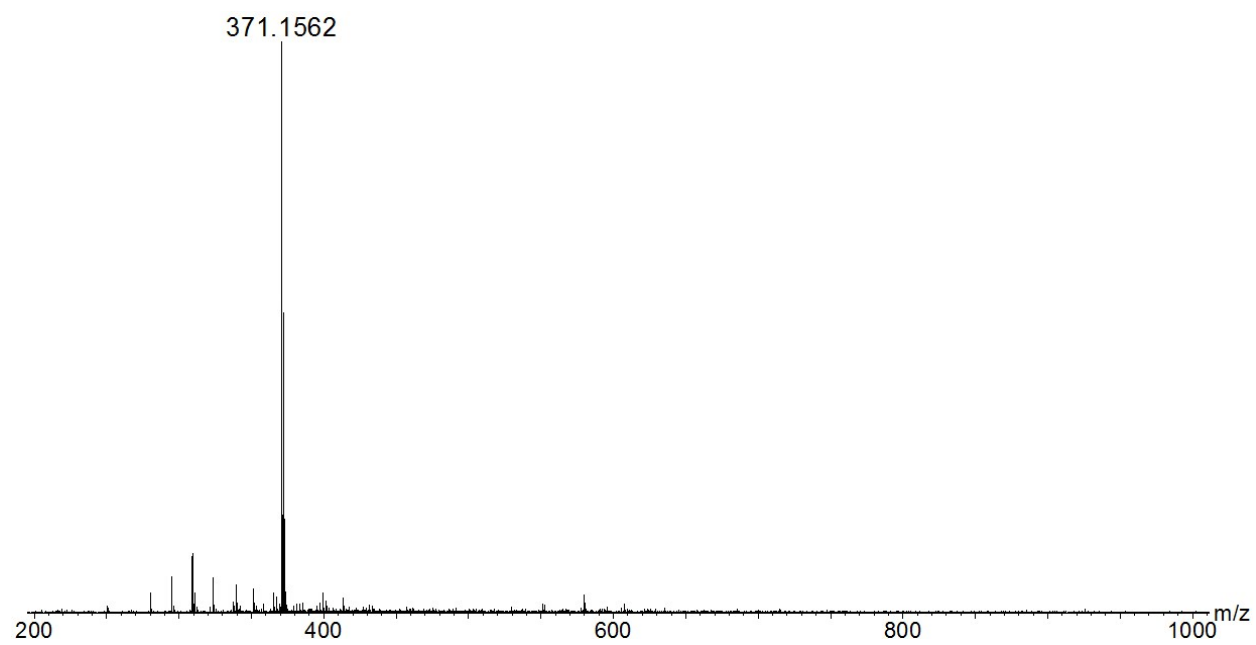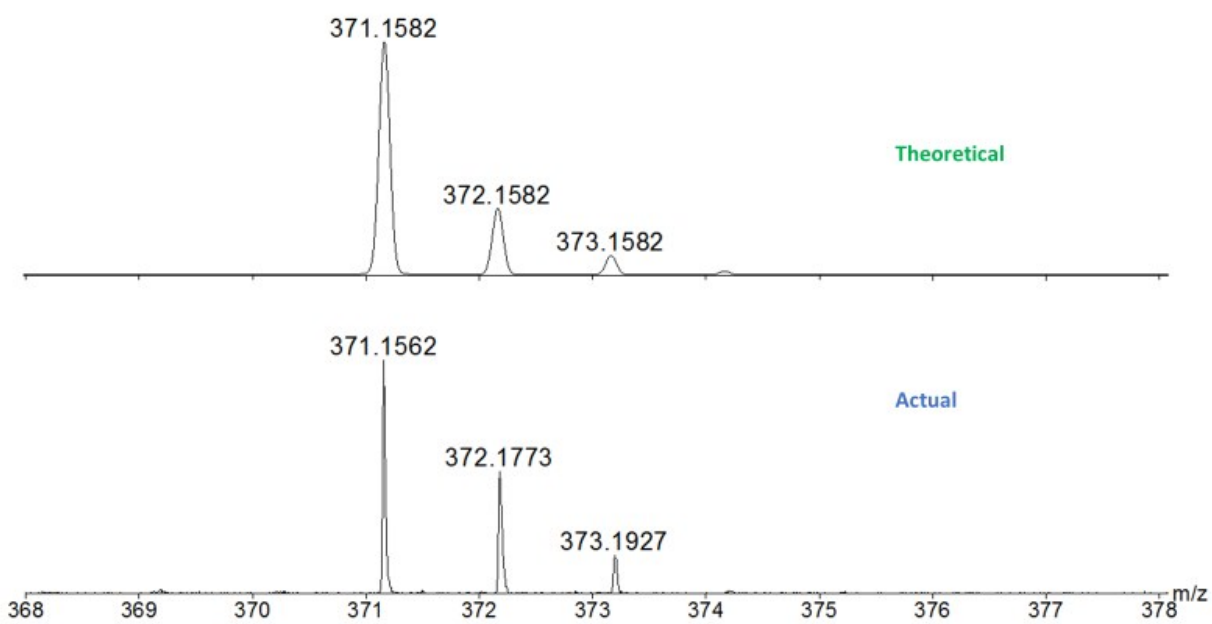

**Figure S2.4** Mass spectra of **3d**

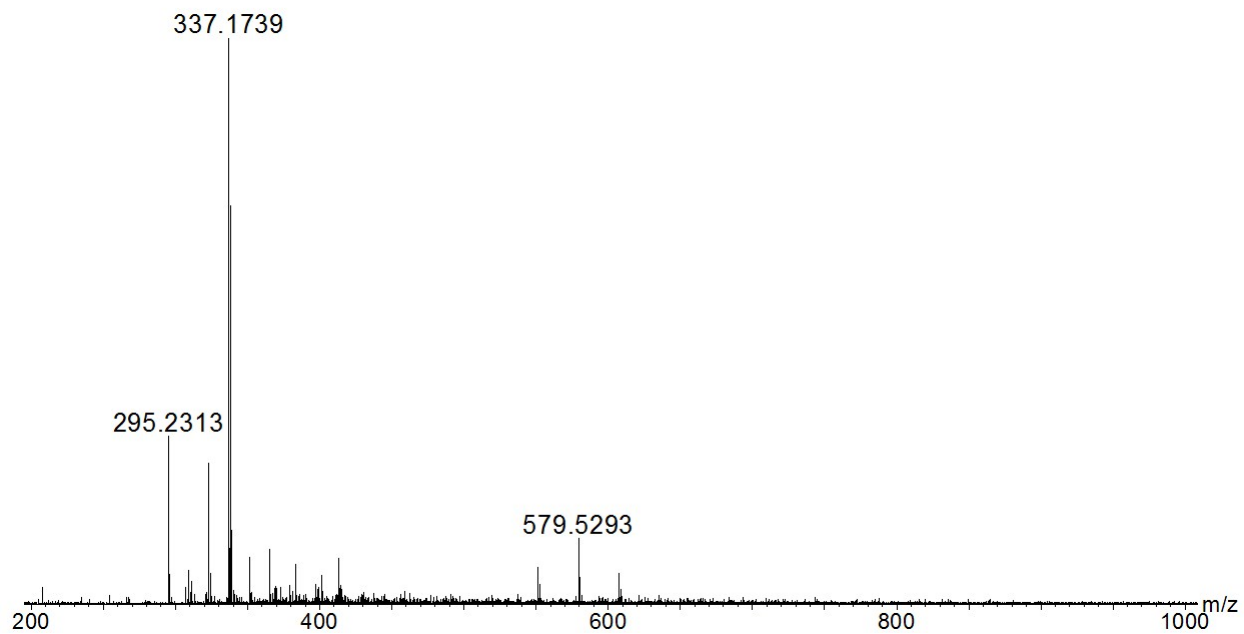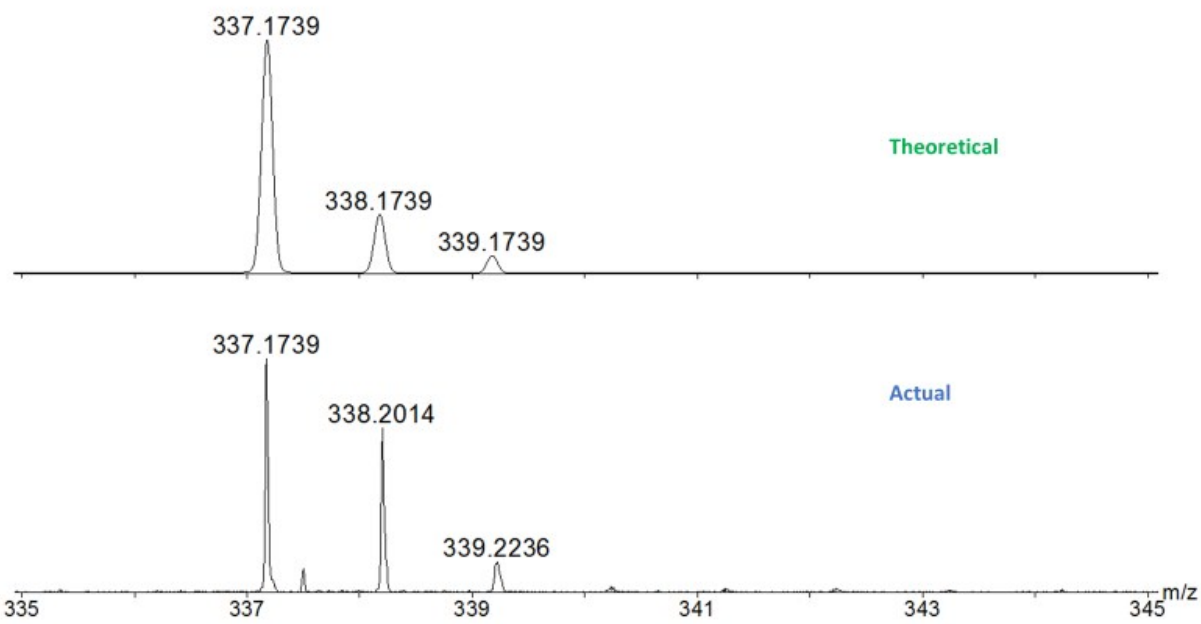

**Figure S2.5** Mass spectra of **3e**

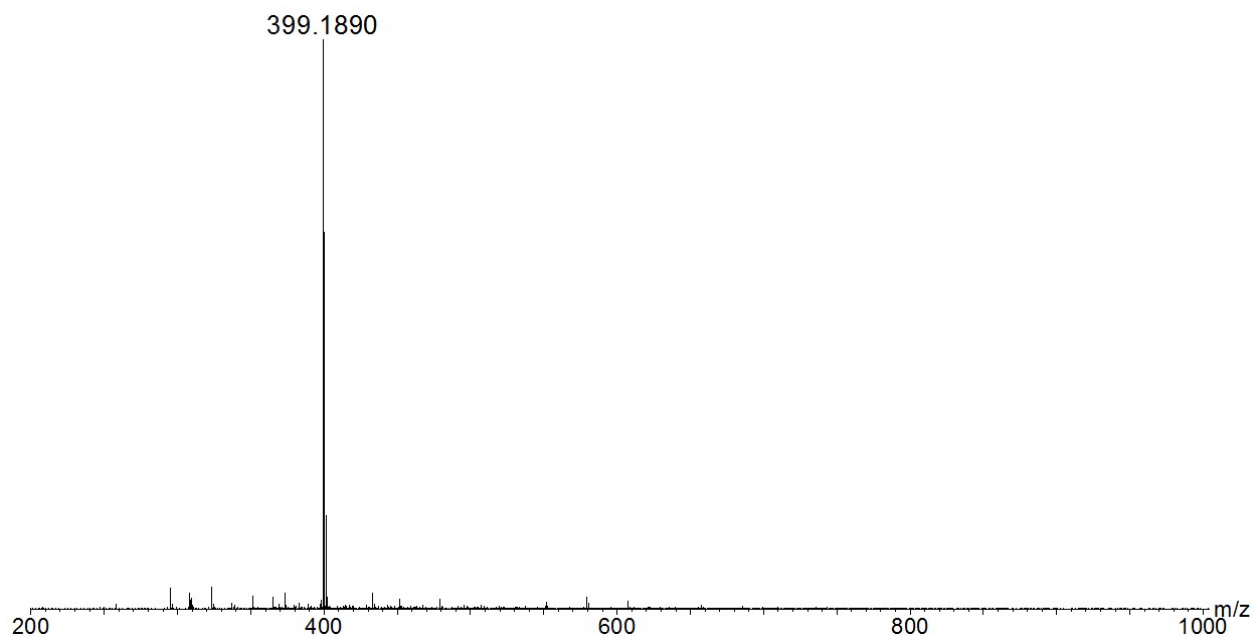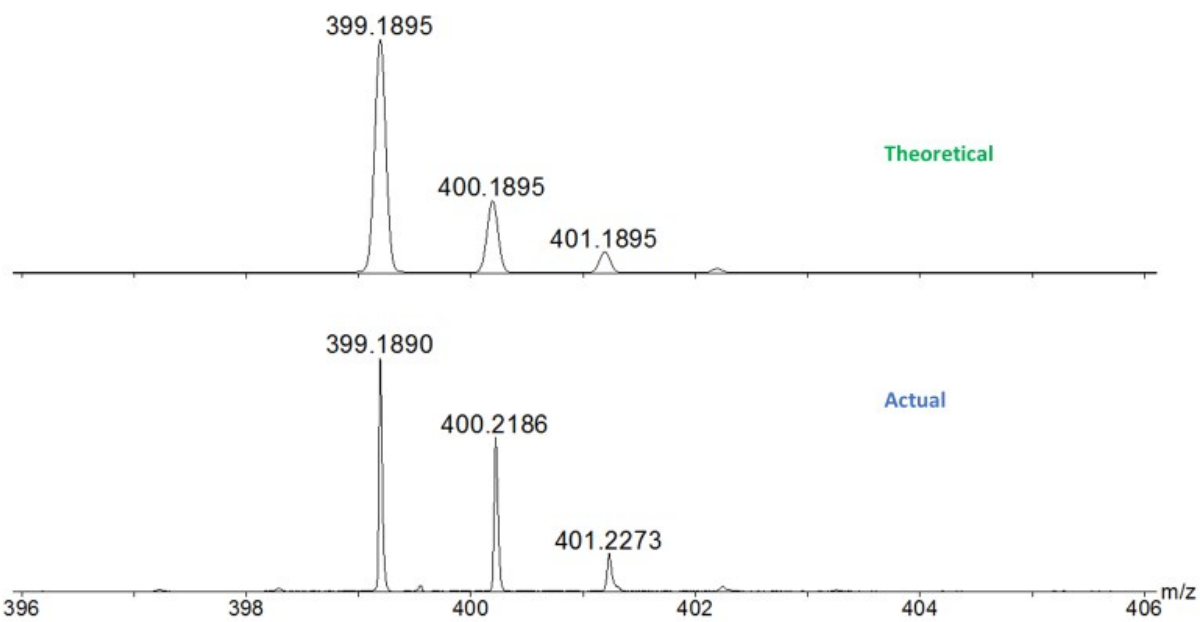

**Figure S2.6** Mass spectra of 3f

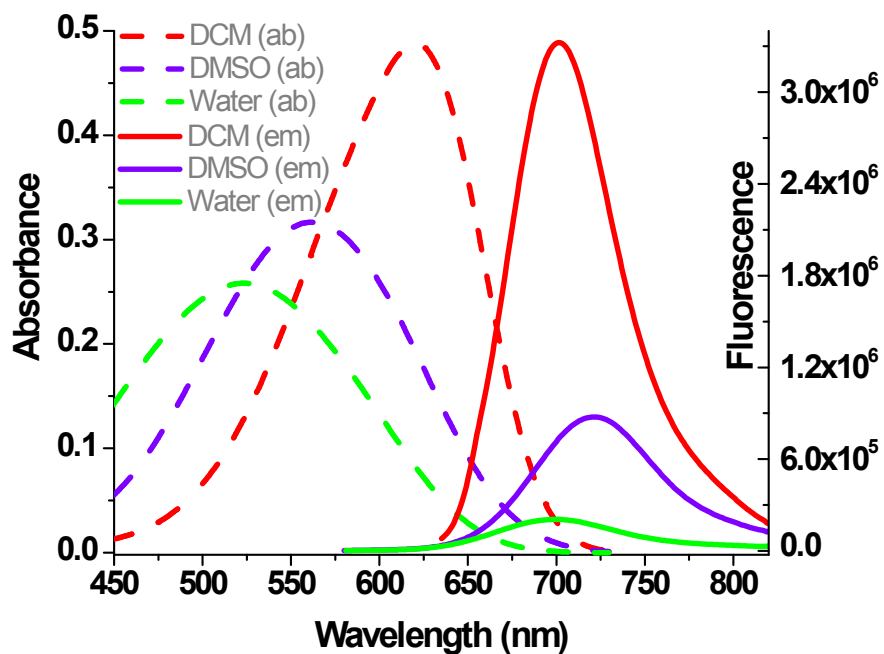

**Figure S3.1** Absorbance and fluorescence emission spectra obtained for **3a** ( $1 \times 10^{-5}$  M) in different solvents at room temperature.

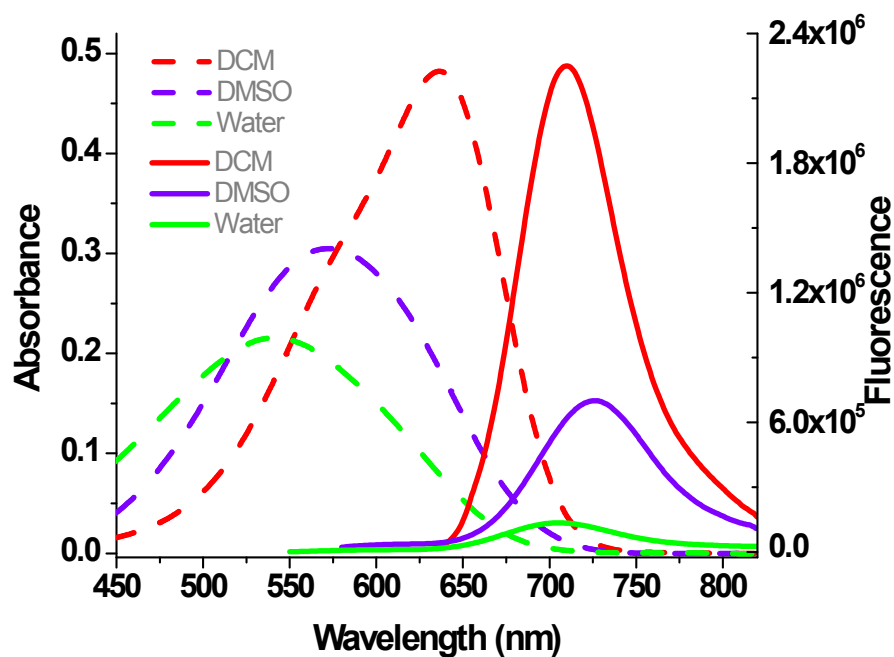

**Figure S3.2** Absorbance and fluorescence emission spectra obtained for **3b** ( $1 \times 10^{-5}$  M) in different solvents at room temperature.

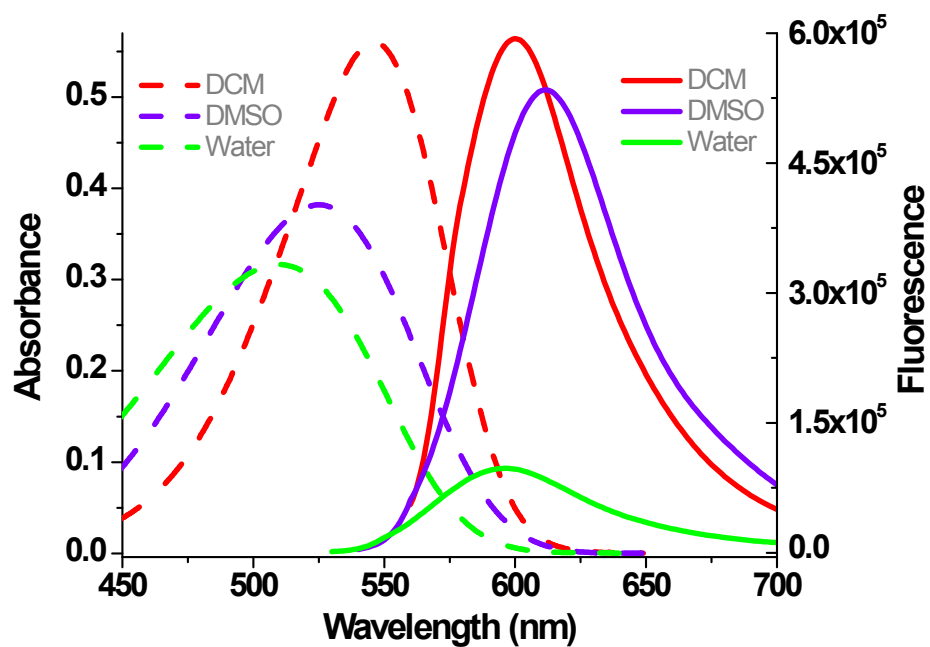

**Figure S3.3** Absorbance and fluorescence emission spectra obtained for **3c** ( $1 \times 10^{-5}$  M) in different solvents at room temperature.

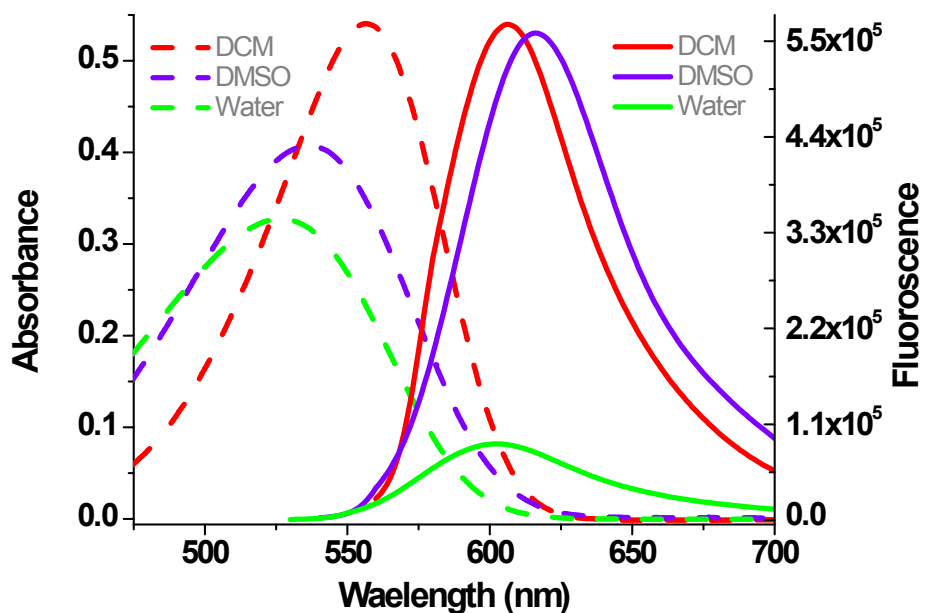

**Figure S3.4** Absorbance and fluorescence emission spectra obtained for **3d** ( $1 \times 10^{-5}$  M) in different solvents at room temperature.

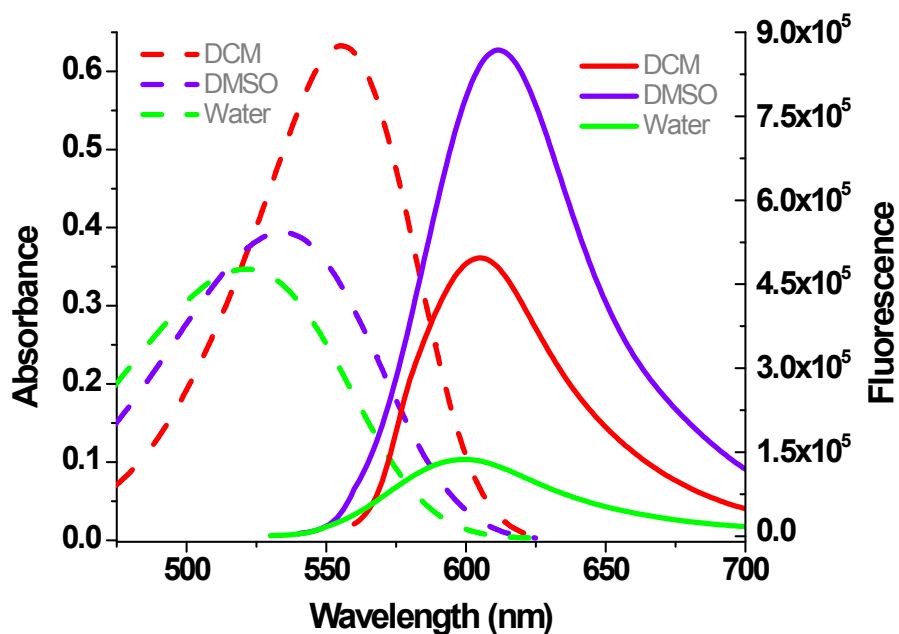

**Figure S3.5** Absorbance and fluorescence emission spectra obtained for **3e** ( $1 \times 10^{-5}$  M) in different solvents at room temperature.

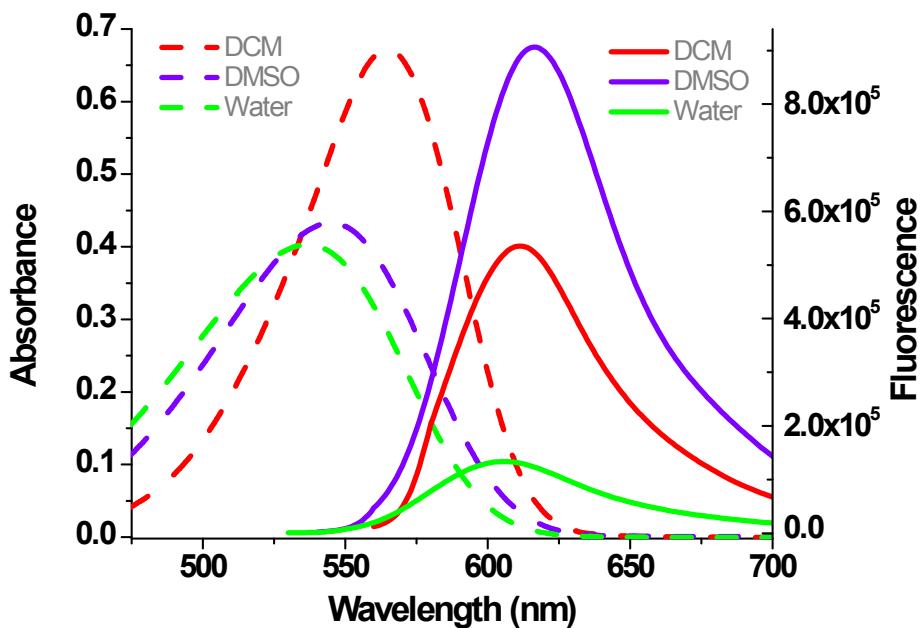

**Figure S3.6** Absorbance and fluorescence emission spectra obtained for **3f** ( $1 \times 10^{-5}$  M) in different solvents at room temperature.

| Entry     | DCM                            |                                                  |                         | DMSO                           |                                                  |                         | Water                          |                                                  |                         |
|-----------|--------------------------------|--------------------------------------------------|-------------------------|--------------------------------|--------------------------------------------------|-------------------------|--------------------------------|--------------------------------------------------|-------------------------|
|           | $\lambda_{\text{abs}}$<br>(nm) | $\lambda_{\text{em}} (\Phi_{\text{fl}})$<br>(nm) | $\Delta\lambda$<br>(nm) | $\lambda_{\text{abs}}$<br>(nm) | $\lambda_{\text{em}} (\Phi_{\text{fl}})$<br>(nm) | $\Delta\lambda$<br>(nm) | $\lambda_{\text{abs}}$<br>(nm) | $\lambda_{\text{em}} (\Phi_{\text{fl}})$<br>(nm) | $\Delta\lambda$<br>(nm) |
| <b>3a</b> | 620                            | 702<br>( <b>0.077</b> )                          | <b>82</b>               | 562                            | 712                                              | <b>150</b>              | 521                            | 699<br>( <b>0.0046</b> )                         | <b>178</b>              |
| <b>3b</b> | 636                            | 712<br>( <b>0.044</b> )                          | <b>76</b>               | 572                            | 726                                              | <b>154</b>              | 541                            | 706<br>( <b>0.0035</b> )                         | <b>165</b>              |
| <b>3c</b> | 546                            | 601<br>( <b>0.011</b> )                          | <b>55</b>               | 528                            | 612                                              | <b>84</b>               | 513                            | 598<br>( <b>0.0025</b> )                         | <b>85</b>               |
| <b>3d</b> | 556                            | 608<br>( <b>0.014</b> )                          | <b>52</b>               | 537                            | 616                                              | <b>79</b>               | 528                            | 603<br>( <b>0.0017</b> )                         | <b>75</b>               |
| <b>3e</b> | 554                            | 607<br>( <b>0.021</b> )                          | <b>53</b>               | 538                            | 612                                              | <b>74</b>               | 523                            | 601<br>( <b>0.0024</b> )                         | <b>73</b>               |
| <b>3f</b> | 564                            | 612<br>( <b>0.012</b> )                          | <b>43</b>               | 546                            | 616                                              | <b>70</b>               | 538                            | 609<br>( <b>0.0024</b> )                         | <b>71</b>               |

**Table S1.** Optical properties obtained for **3a** – **3f**.



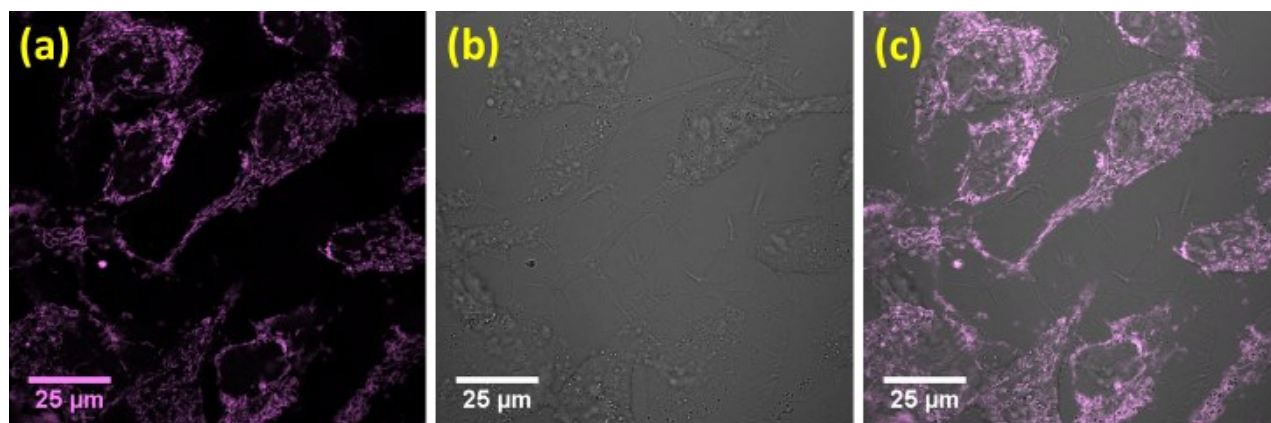

**Figure S4.1** Fluorescent confocal microscopy images of MO3.13 cells (x100) treated with **3a** (200 nM) for 1 hour. From left to right images show the fluorescence **3a** (a), bright field (b) and overlapped image (c) respectively. 640 nm laser was used for excitation.

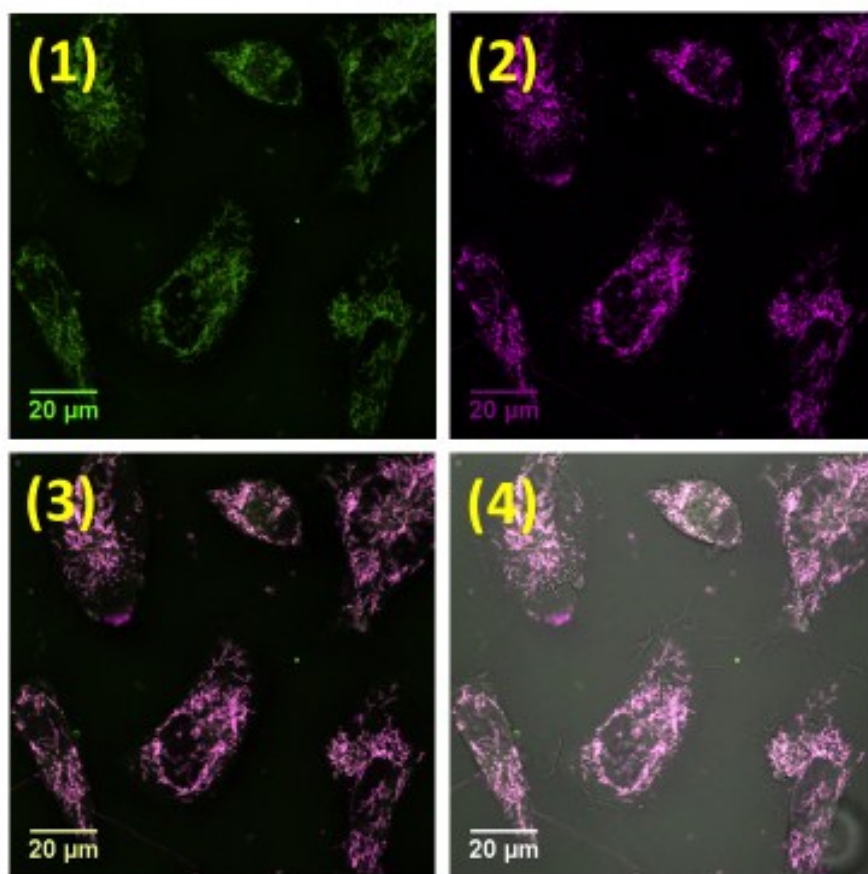

**Figure S4.2** Fluorescent confocal microscopy images of MO3.13 cells (x100) treated with **3a** (200 nM) for 1 hour. From left to right images show the fluorescence of mito-tracker green (1), fluorescence **3a** (2), overlapped image (3) and overlapped image with bright field (4) respectively. 488/640 nm lasers were used for excitation.

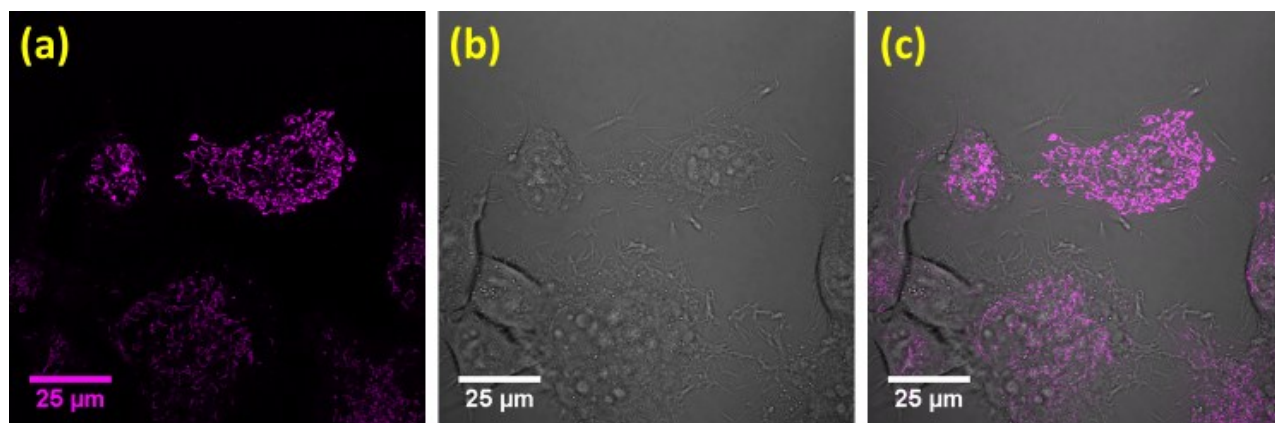

**Figure S5.1** Fluorescent confocal microscopy images of MO3.13 cells (x100) treated with **3b** (200 nM) for 1 hour. From left to right images show the fluorescence **3b** (a), bright field (b) and overlapped image (c) respectively. 640 nm laser was used for excitation.

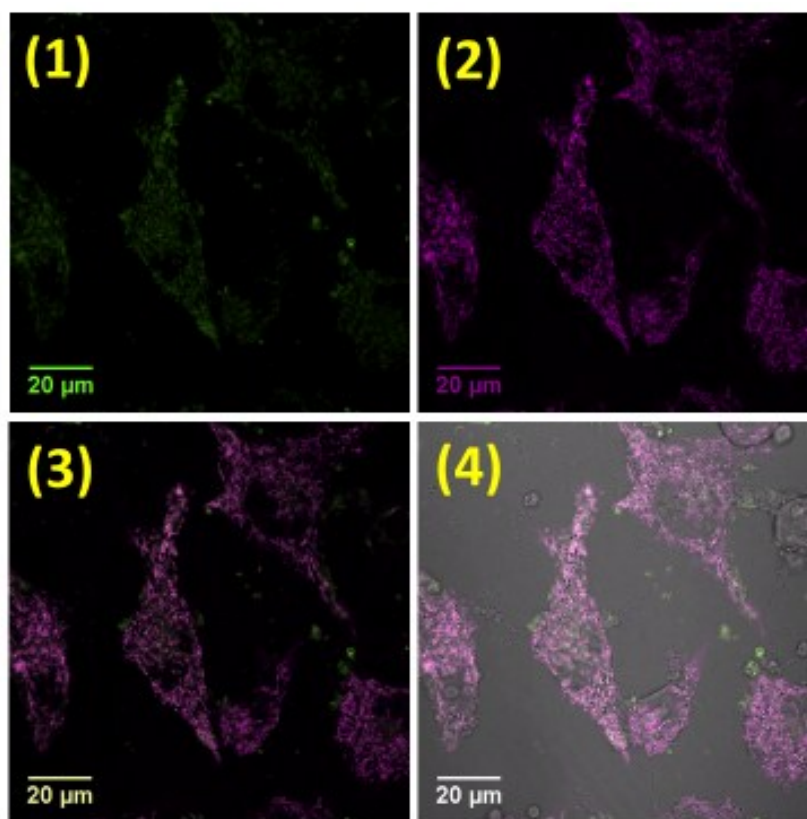

**Figure S5.1** Fluorescent confocal microscopy images of MO3.13 cells (x100) treated with **3b** (200 nM) for 1 hour. From left to right images show the fluorescence of mito-tracker green (1), fluorescence **3b** (2), overlapped image (3) and overlapped image with bright field (4) respectively. 488/640 nm lasers were used for excitation.

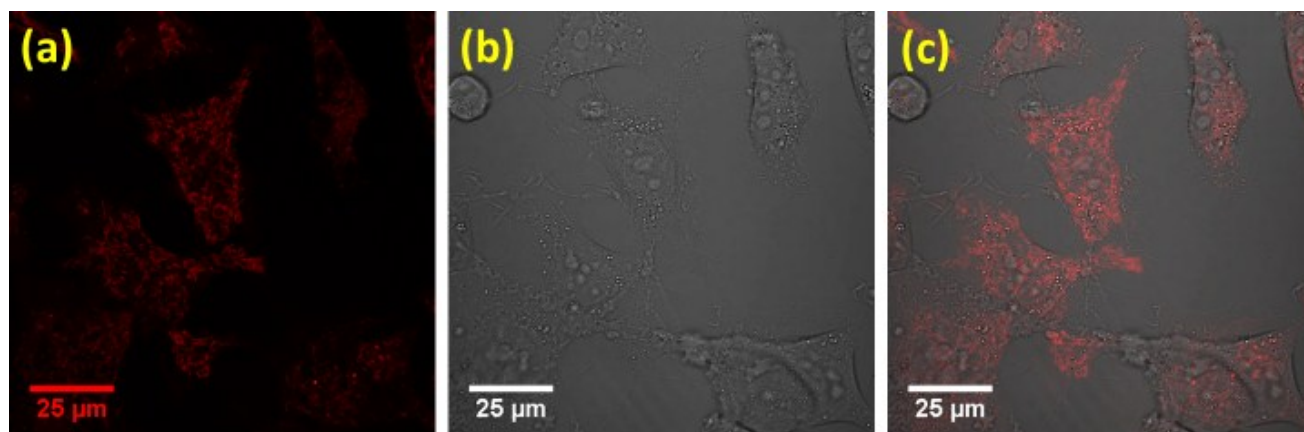

**Figure S6.1** Fluorescent confocal microscopy images of MO3.13 cells (x100) treated with **3c** (200 nM) for 1 hour. From left to right images show the fluorescence **3c** (a), bright field (b) and overlapped image (c) respectively. 561 nm laser was used for excitation.

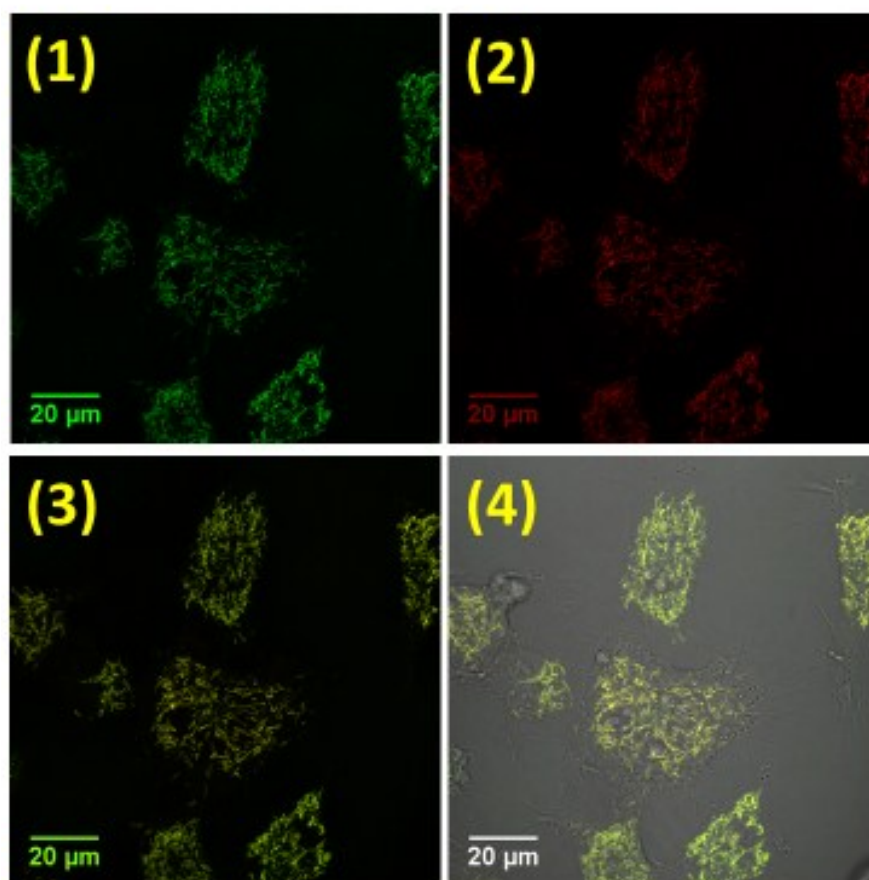

**Figure S6.2** Fluorescent confocal microscopy images of MO3.13 cells (x100) treated with **3c** (200 nM) for 1 hour. From left to right images show the fluorescence of mito-tracker green (1), fluorescence **3c** (2), overlapped image (3) and overlapped image with bright field (4) respectively. 488/561 nm lasers were used for excitation.



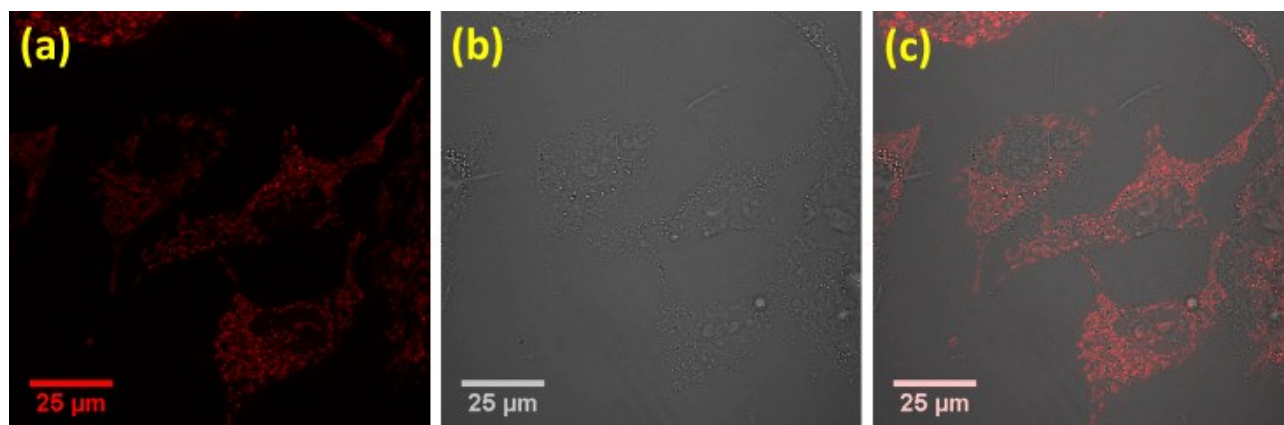

**Figure S7.1** Fluorescent confocal microscopy images of MO3.13 cells (x100) treated with **3d** (200 nM) for 1 hour. From left to right images show the fluorescence **3d** (a), bright field (b) and overlapped image (c) respectively. 561 nm laser was used for excitation.

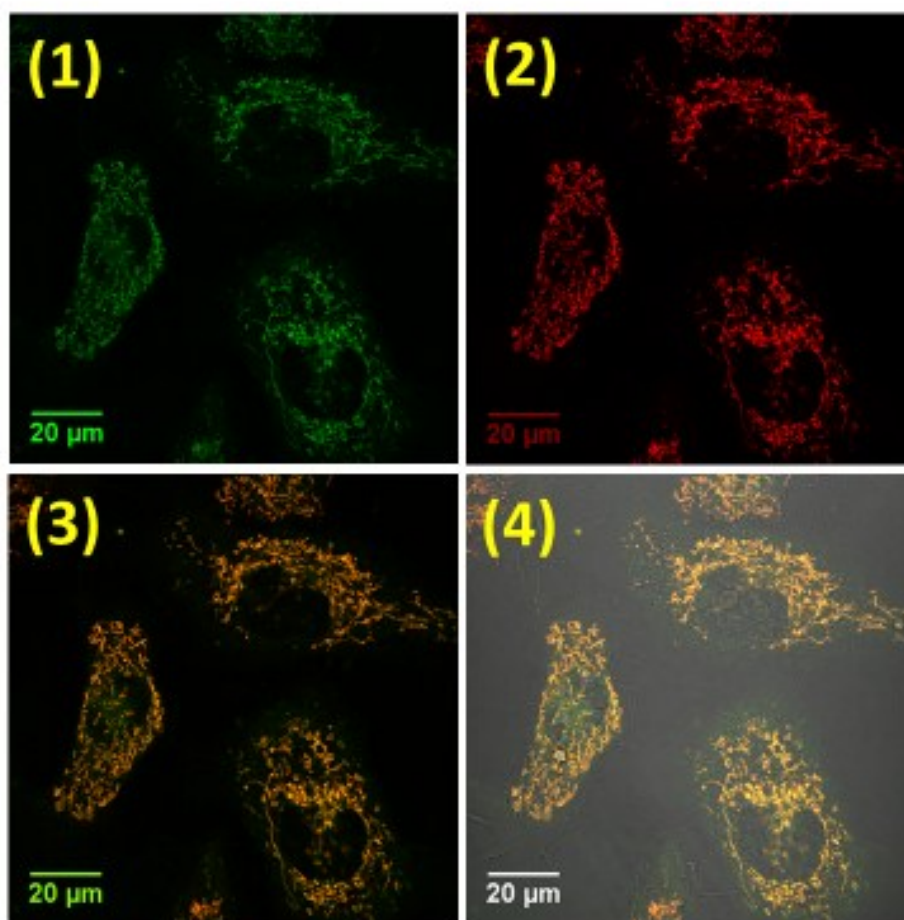

**Figure S7.2** Fluorescent confocal microscopy images of MO3.13 cells (x100) treated with **3d** (200 nM) for 1 hour. From left to right images show the fluorescence of mito-tracker green (1), fluorescence **3d** (2), overlapped image (3) and overlapped image with bright field (4) respectively. 488/561 nm lasers were used for excitation.

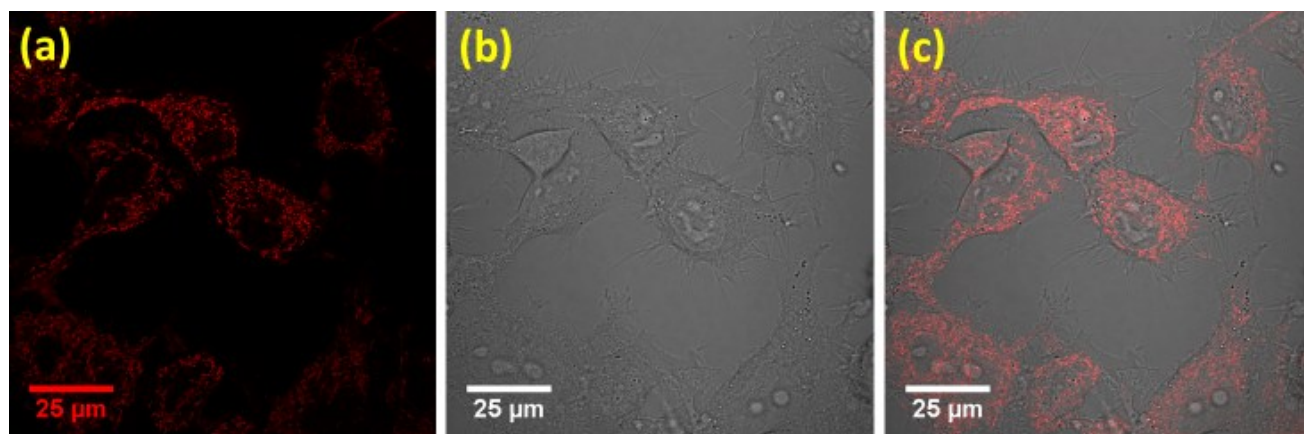

**Figure S8.1** Fluorescent confocal microscopy images of MO3.13 cells (x100) treated with **3e** (200 nM) for 1 hour. From left to right images show the fluorescence **3e** (a), bright field (b) and overlapped image (c) respectively. 561 nm laser was used for excitation.

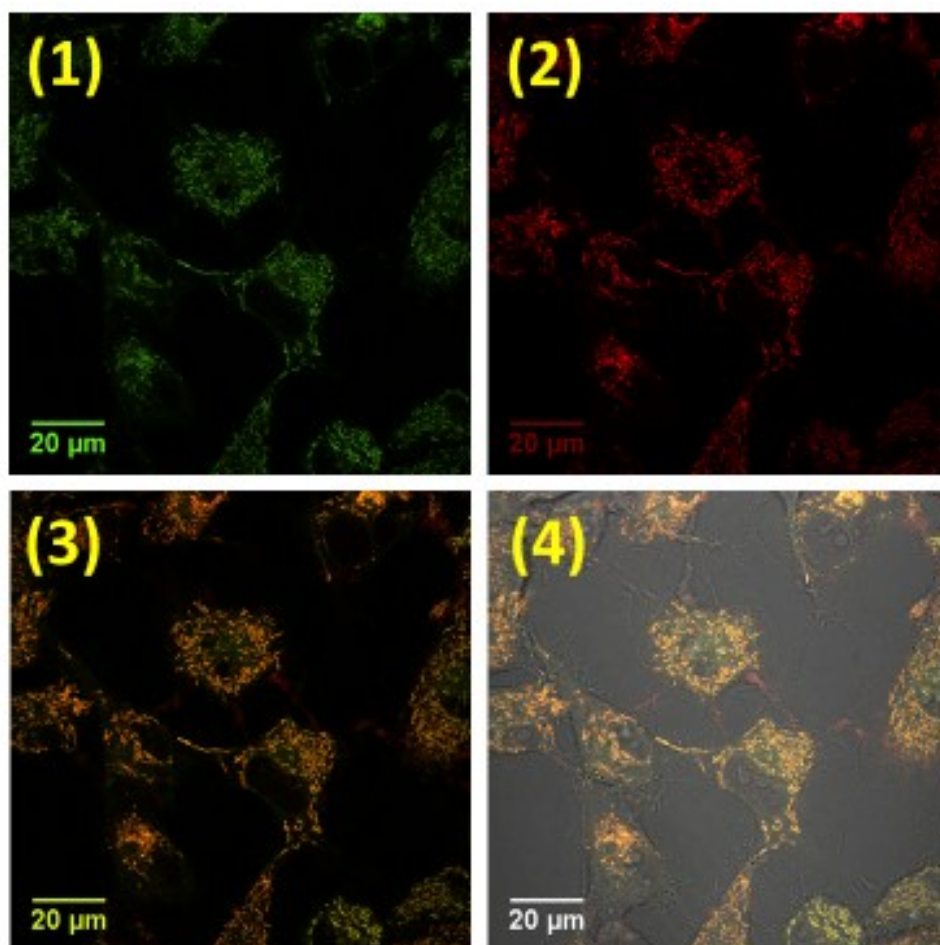

**Figure S8.2** Fluorescent confocal microscopy images of MO3.13 cells (x100) treated with **3e** (200 nM) for 1 hour. From left to right images show the fluorescence of mito-tracker green (1), fluorescence **3e** (2), overlapped image (3) and overlapped image with bright field (4) respectively. 488/561 nm lasers were used for excitation.

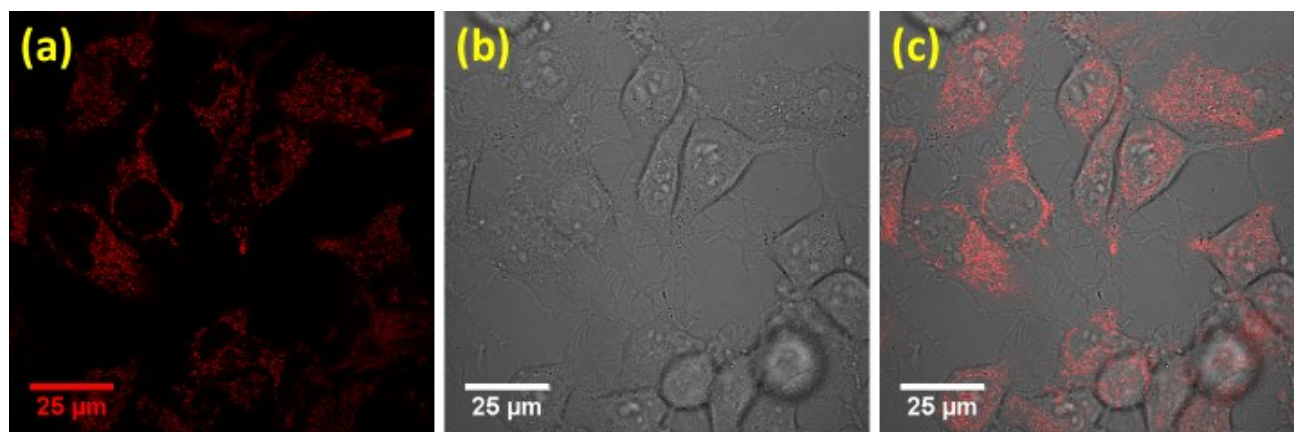

**Figure S9.1** Fluorescent confocal microscopy images of MO3.13 cells (x100) treated with **3f** (200 nM) for 1 hour. From left to right images show the fluorescence **3f** (a), bright field (b) and overlapped image (c) respectively. 561 nm laser was used for excitation.

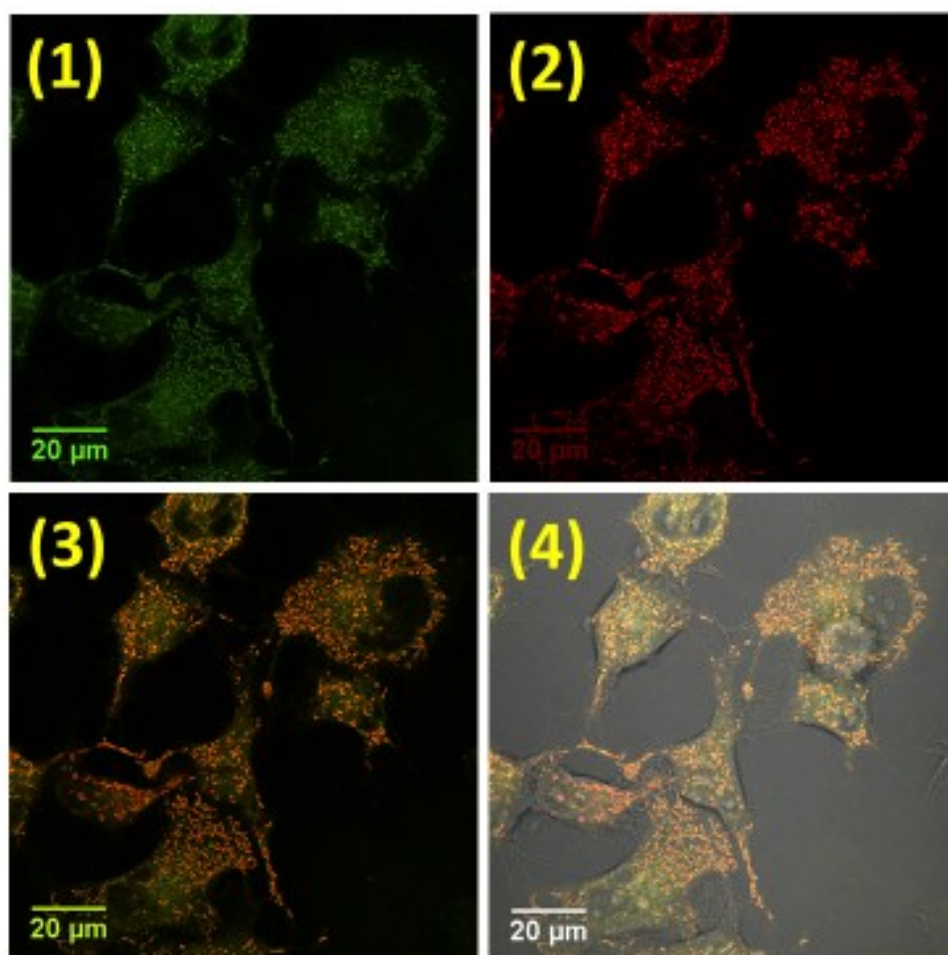

**Figure S9.2** Fluorescent confocal microscopy images of MO3.13 cells (x100) treated with **3f** (200 nM) for 1 hour. From left to right images show the fluorescence of mito-tracker green (1), fluorescence **3f** (2), overlapped image (3) and overlapped image with bright field (4) respectively. 488/561 nm lasers were used for excitation.



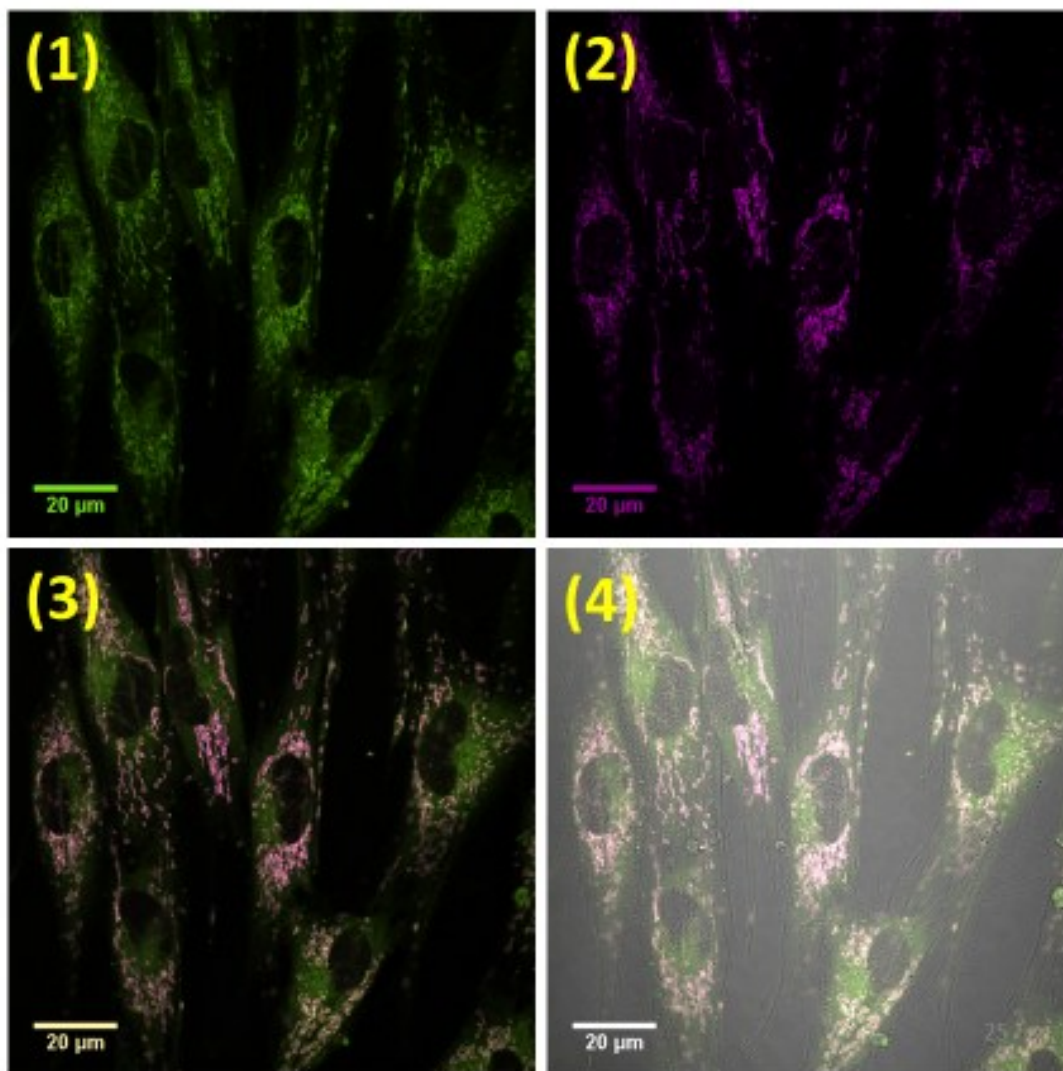

**Figure S10** Fluorescent confocal microscopy images of human ovarian fibroblast cells (HOF) cells treated with **3a** (200 nM) for 1 hour. From left to right images show the fluorescence of mito-tracker green (1), fluorescence **3a** (2), overlapped image (3) and overlapped image with bright field (4) respectively. 488/640 nm lasers were used for excitation.

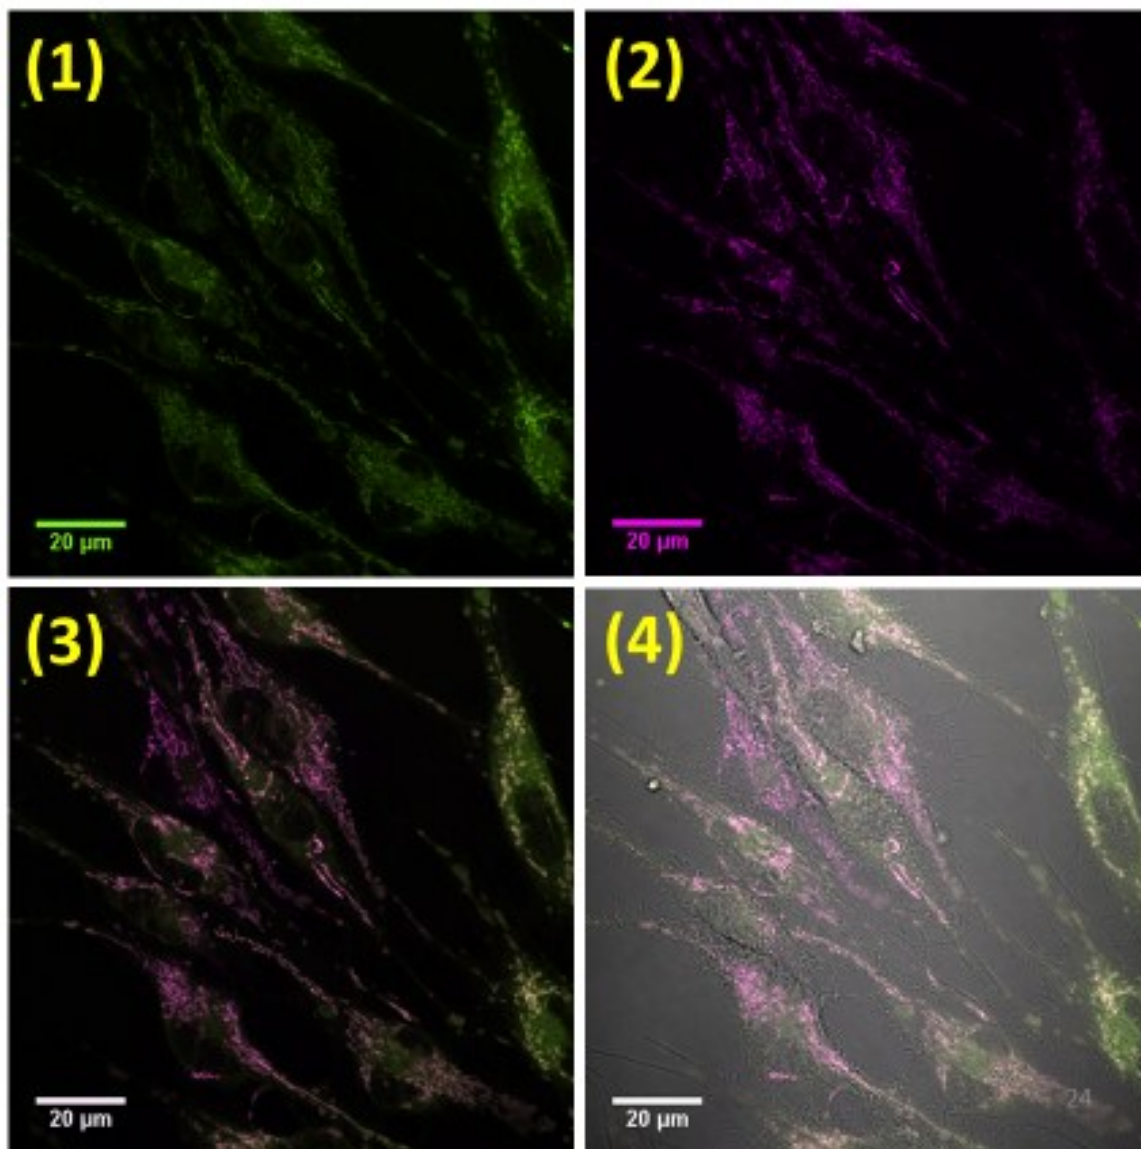

**Figure S11** Fluorescent confocal microscopy images of human ovarian fibroblast cells (HOF) cells treated with **3b** (200 nM) for 1 hour. From left to right images show the fluorescence of mito-tracker green (1), fluorescence **3b** (2), overlapped image (3) and overlapped image with bright field (4) respectively. 488/640 nm lasers were used for excitation.



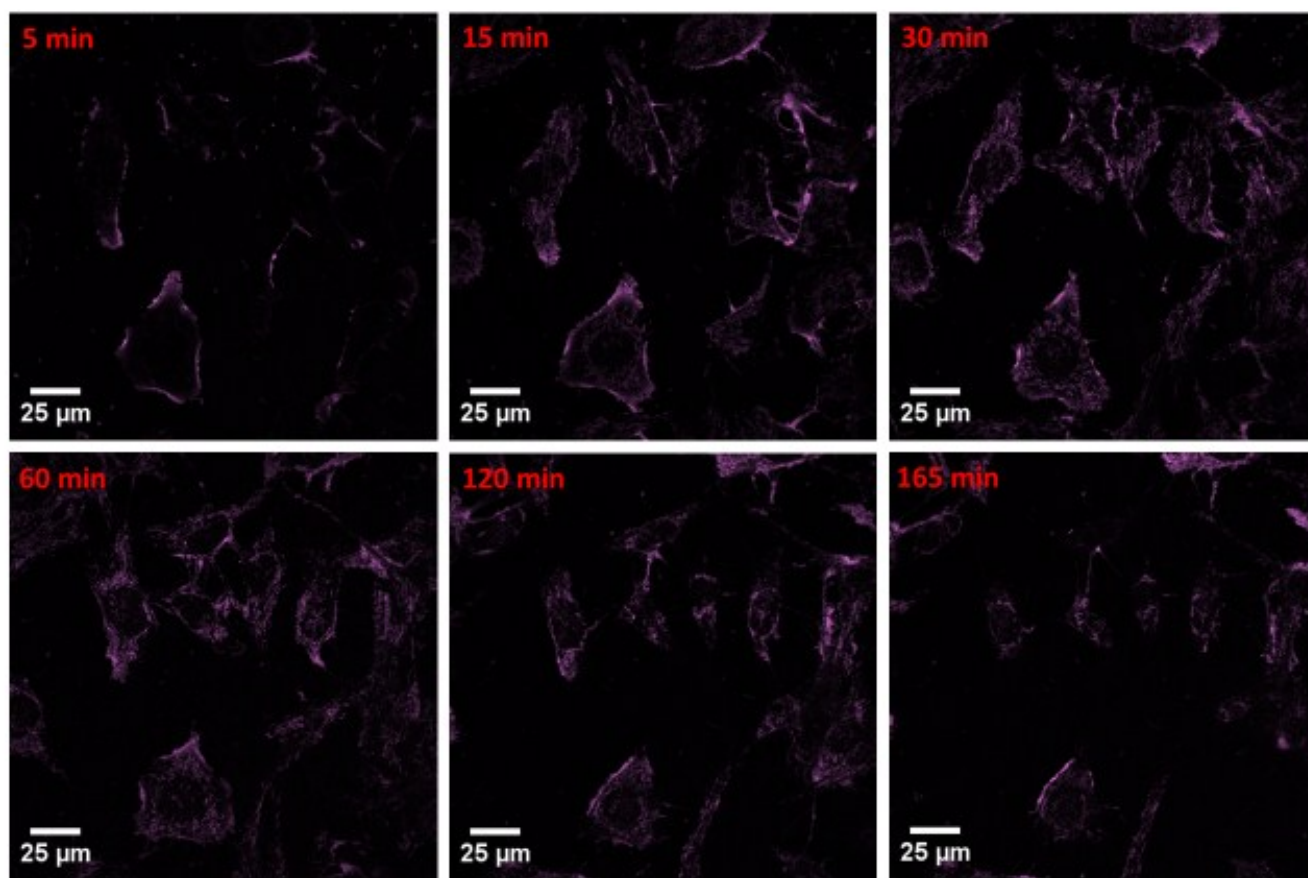

**Figure S12** Fluorescent confocal microscopy images of MO3.13 cells (x100) treated with **3a** (200 nM) for a period of 2.5 hour. 640 nm laser was used for excitation.

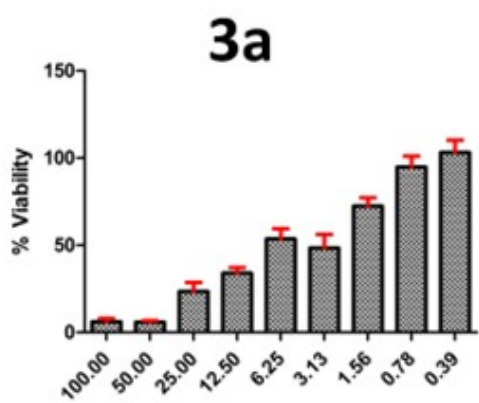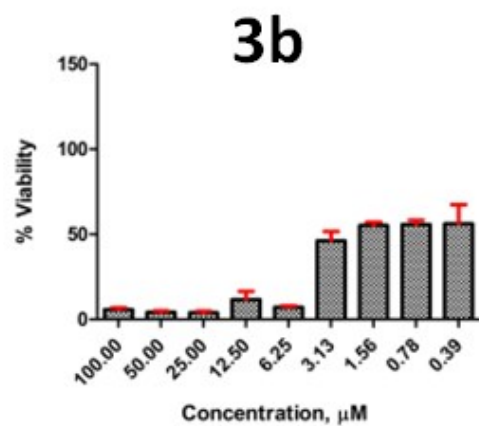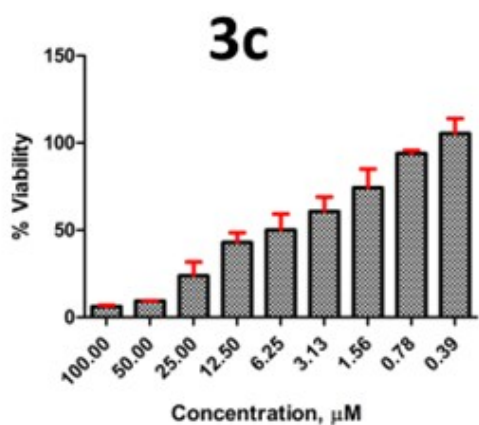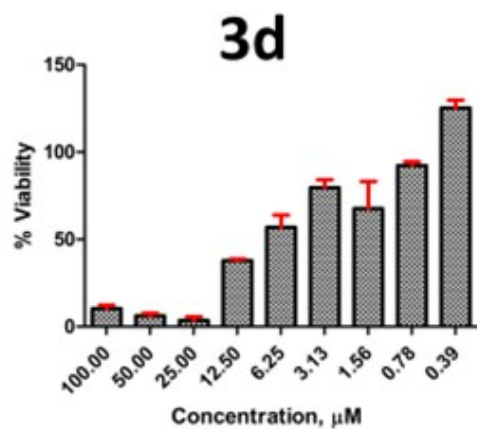

Figure S13 Cell viability results (bar-chart) obtained for **3a**, **3b**, **3c** and **3d** by MTT cell viability assay.

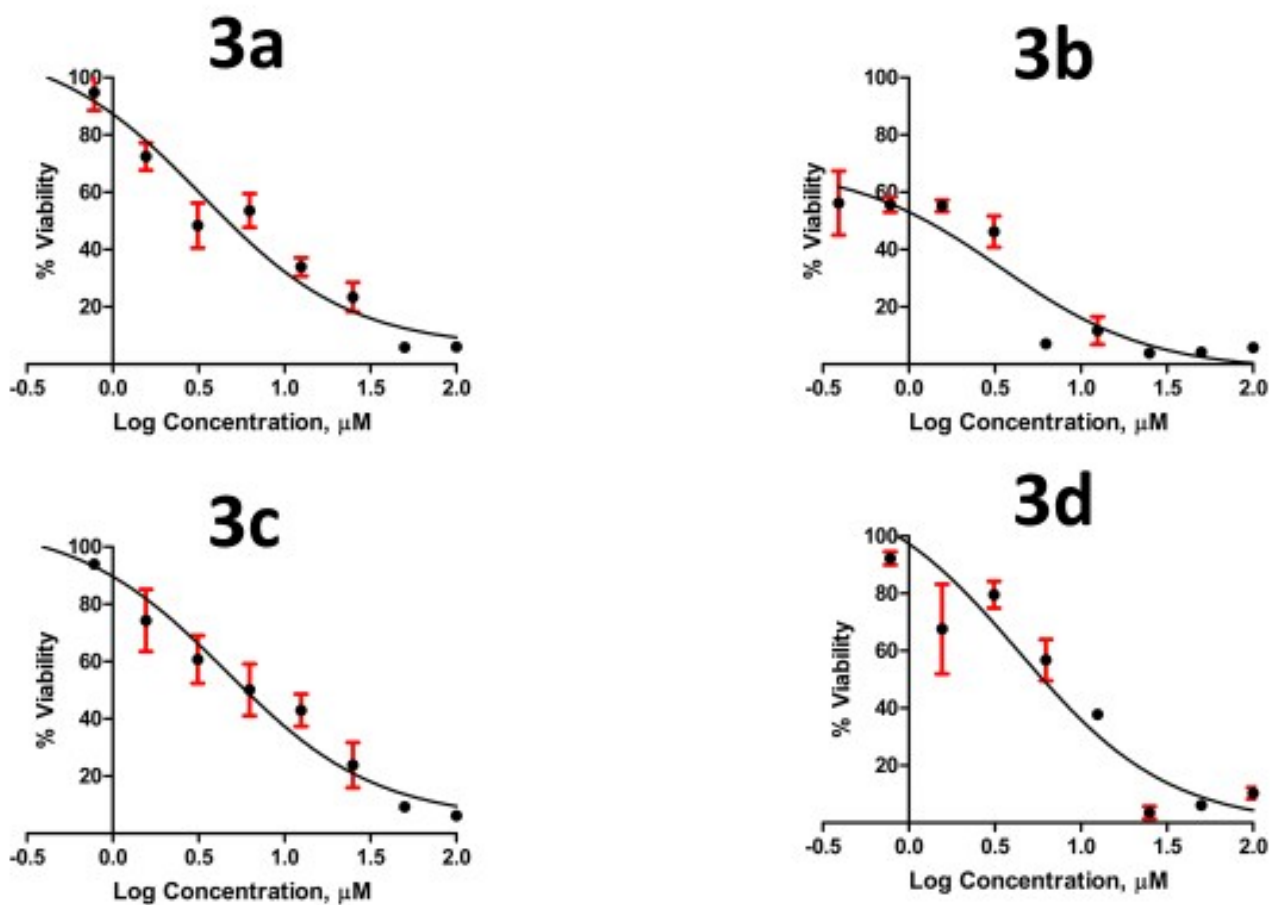

**Figure S14** Cell viability results (cell viability curve) obtained for **3a**, **3b**, **3c** and **3d** by MTT cell viability assay.

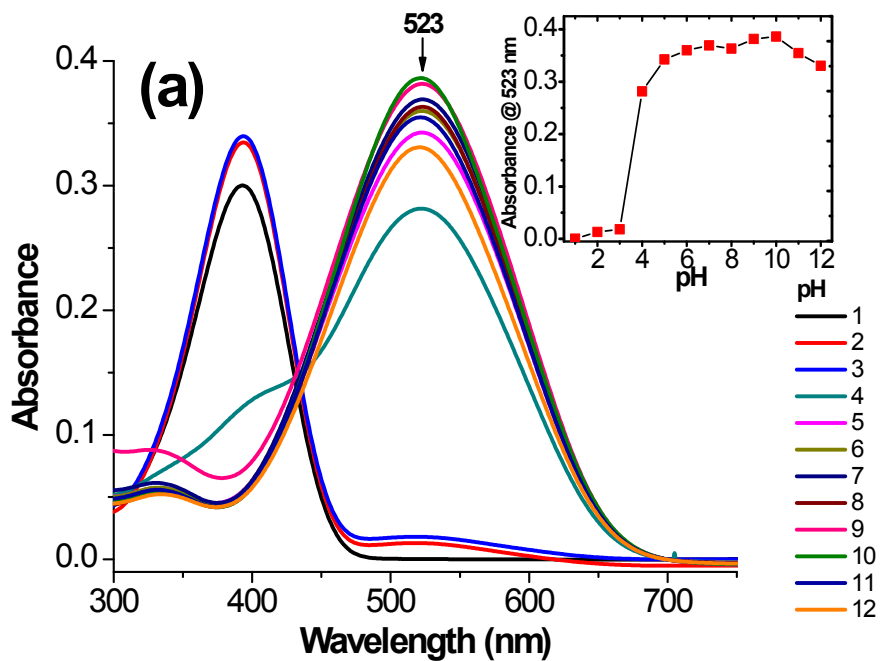

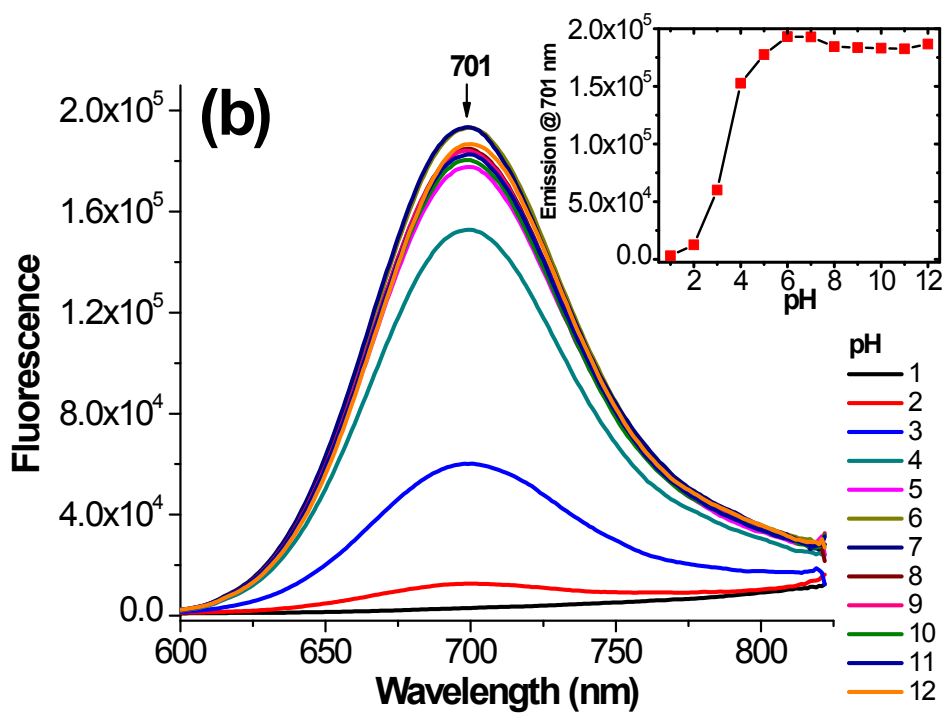

**Figure S15** Absorbance (a) and fluorescence emission (b) spectra obtained for **3a** ( $1 \times 10^{-5}$  M) in different pH conditions at room temperature.

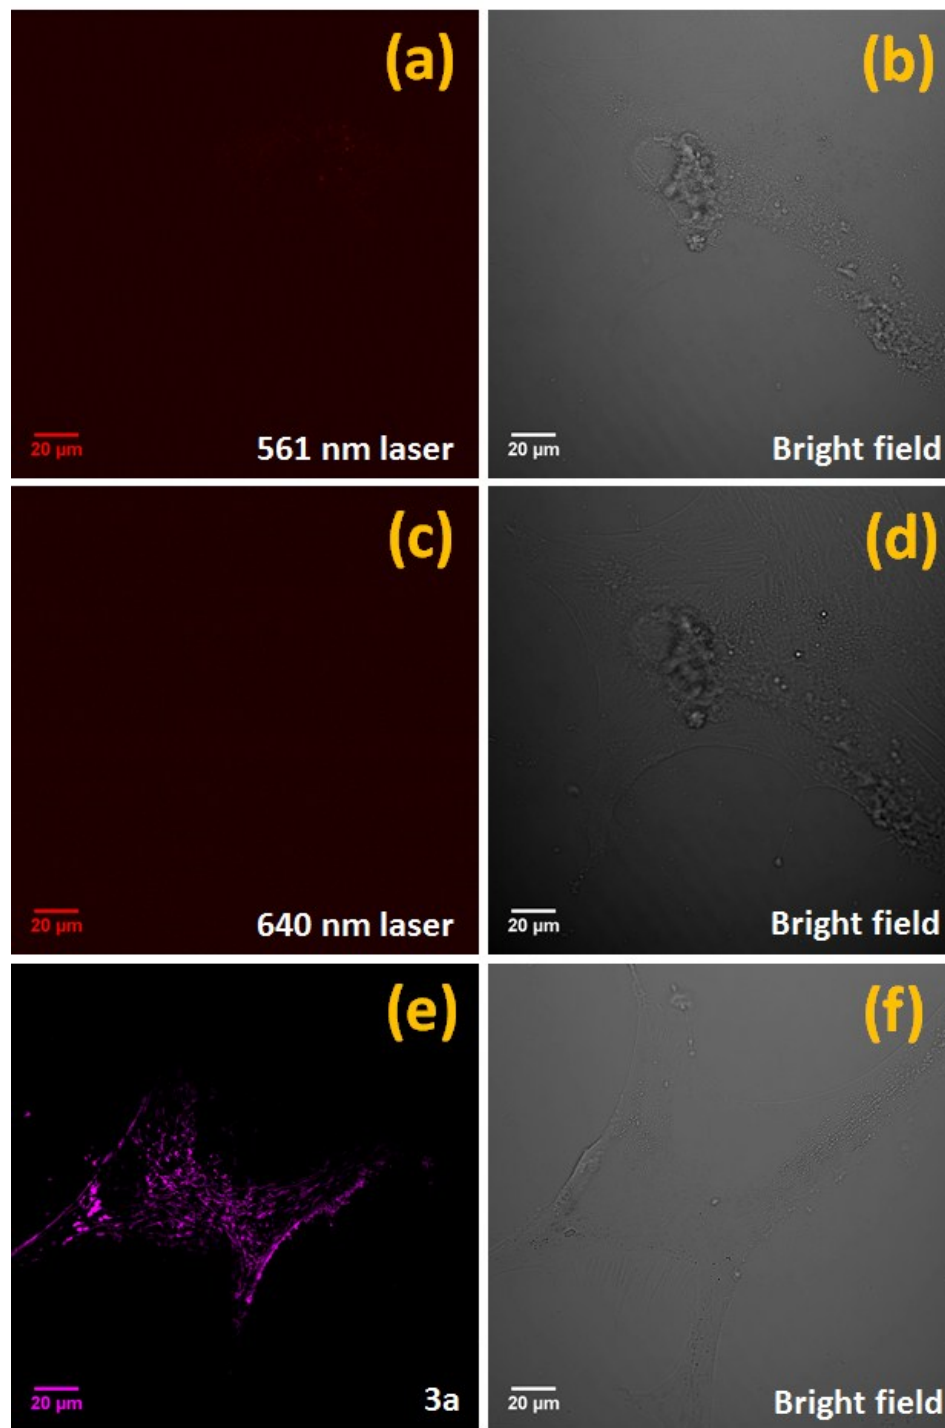

**Figure S16** Fluorescent confocal microscopy images of MO3.13 cells (x100) obtained in the absence of any probe with 561 nm laser (a – b) and 640 nm laser (c – d) and treated with **3a** (200 nM) for 30 minutes. 640 nm laser was used for **3a** excitation.
